# Supplementary material
Source: publisher figshare collection journal article supplement (https://gsapubs.figshare.com/ndownloader/files/22741115)
Supplement: Supplementary file 1 [file 22741115]

PLUTON EMPLACEMENT BY SHEETING AND VERTICAL BALLOONING  
IN PART OF THE  
SOUTHEAST COAST PLUTONIC COMPLEX,  
BRITISH COLUMBIA

E. H. Brown and W.C. McClelland

## DATA REPOSITORY

### Procedures

#### Thermobarometry

Crystallization temperatures of the plutons (DR Table 1) were derived from compositions of coexisting plagioclase and hornblende utilizing the calibration of Holland and Blundy (1994). Barometry of the plutons is based on Al-in-hornblende, for which we used the calibration of Anderson and Smith (1995) which combines experimental work of Johnson and Rutherford (1989) and Schmidt (1992) to yield a pressure determination based both on the aluminum content of hornblende and the Holland and Blundy (1994) temperature of crystallization. The samples of this study are not ideal in the sense that many lack K-feldspar and sphene, suggested by some to be necessary phases in a pressure-buffering assemblage (e.g. Hollister and others, 1987). However, the temperature correction probably alleviates some degree of freedom of the incomplete assemblage. Furthermore, two observations suggest validity of the results: samples containing K-feldspar do not give significantly different results from those that lack this phase in the same area, and pressures determined for aureoles using garnet-aluminum silicate barometry (see below) correspond closely with Al-in-hornblende pressure from the adjacent pluton.

Thermobarometry of schists (DR Table 1) was determined from mineral equilibria: garnet+aluminum silicate+biotite+plagioclase+quartz or garnet+muscovite+biotite+plagioclase+quartz. The results are based on rim or near rim compositions of zoned minerals, and represent maximum recorded prograde conditions. Comparing results on replicate samples from the same or nearby outcrops, uncertainties due to mineral heterogeneity and analytical error are within  $\pm 1.0$  kbar and  $50^\circ$  C. Pressure-temperature calibration of the mineral equilibria is based on Berman (1991), using solution models as follows: garnet, Berman (1990); biotite, McMullin and others (1991), plagioclase, Fuhrman and Lindsley (1988).

#### U-Pb Geochronology

U-Pb zircon analyses were performed on 11 samples of plutons (Fig. 3; DR Table 2). Analytical procedures are outlined in McClelland and Mattinson (1996). The general rationale and basic techniques of the partial dissolution experiments are outlined by Mattinson (1994) and McClelland and Mattinson (1996). Error assignment for individual analyses follows Mattinson (1987) and is consistent with Ludwig (1992). Calculated  $^{207}\text{Pb}/^{206}\text{Pb}$  and  $^{206}\text{Pb}/^{238}\text{U}$  ratios incorporate a Th correction for potential deficit of radiogenic  $^{206}\text{Pb}$  induced by exclusion of  $^{230}\text{Th}$  during zircon crystallization (Mattinson, 1973; Schärer, 1984; Parrish, 1990). For this study, a  $75\% \pm 25\%$  efficiency in  $^{230}\text{Th}$  exclusion during zircon crystallization has been assumed.

## Geology of the Plutons

### Clear Creek Orthogneiss

The pluton termed here the Clear Creek Orthogneiss (published Fig. 4) was previously named the Hornet Creek Gneiss (Journeay and Friedman, 1993). It is renamed here because the body is centered on the Clear Creek drainage, and another pluton is prominent in the Hornet Creek drainage. A U-Pb zircon age of "ca. 226" Ma is reported by Monger (1989, analysis by van der Heyden). The protolith for the orthogneiss is tonalite (DR Fig. 2a). The rock is strongly gneissic, thoroughly recrystallized, and fairly homogenous. In the center of the body, at the core of the antiformal structure that folds the pluton, we observed an outcrop tens of meters across displaying a migmatitic injection complex of the orthogneiss into basic schist. This could represent the basal contact of the pluton and suggests intrusion of the pluton as an originally horizontal sheet. The southwestern contact of the Clear Creek Orthogneiss with the Cogburn terrane is intrusive, parallel to regional foliation, as evidenced by numerous sills of the orthogneiss in ribbon chert within 50 meters of the main orthogneiss body and xenoliths of schist within the orthogneiss sills.

### Fir Creek pluton

The Fir Creek pluton was previously mapped by Reamsbottom (1971, 1974) as a metavolcanic rock in what he called the "Breakenridge Formation", wrapping the north end of the Breakenridge pluton. We interpret this body to be a sill based on intrusive contact relations, and separate it from the Breakenridge plutons based on its considerably older age ( $157.4 \pm 0.5$  Ma, DR Fig. 3a). The map extent shown to the north is based largely on Reamsbottom (1971). Three discordant zircon fractions indicate that this sample has experienced Pb-loss and contains inherited xenocrystic components of undetermined age. The Fir Creek pluton is contemporaneous with and is intruded into volcanic rocks of the Slollicum terrane and therefore probably represents a plutonic component of that terrane.

### Settler Creek pluton

The Settler Creek pluton (published Fig. 4), is a small body with good magmatic textures and an aureole defined by pseudomorphed andalusite. An age of  $96.7 \pm 1.0$  Ma is interpreted on the basis of two concordant zircon fractions (DR Fig. 3b).

### Hut Creek pluton

The Hut Creek pluton (published Fig. 4) has magmatic textures, locally well-developed magmatic foliation, and a narrow aureole defined by sillimanite and pseudomorphed andalusite. Four concordant zircon fractions from this body indicate an age of  $94.6 \pm 0.5$  Ma (DR Fig 3c).

### Hornet Creek pluton

The Hornet Creek pluton (published Fig 3), newly named in this study, has magmatic textures throughout most of the body. The north and west sides of the Hornet Creek pluton have been overprinted by solid-state deformation that affects also the Breakenridge pluton. The pluton is not well mapped at the south end. An age of  $98.3 \pm 2$  Ma is interpreted for this sample on the basis of a nearly concordant leach residue (DR Fig. 3d). Three discordant conventional zircon fractions from the Hornet Creek body indicate the presence of inherited xenocrystic components.

### Breakenridge plutonic complex

Following Journeay and Friedman (1993), we use the name Breakenridge plutonic complex to include plutonic rocks in the core of the Breakenridge antiform and satellite sills in country rock up to several kilometers from the main body. This usage differs from that of Reamsbottom (1971, 1974) who used the term "Mount Breakenridge Complex" to refer to the

central pluton area only. He considered outlying sheets of gneiss to be of sedimentary and volcanic origin and included them in his "Breakenridge Formation"; however, our observation of homogenous textures, mafic inclusions, and intrusive contacts indicates a plutonic protolith.

Epizonal intrusion of the Breakenridge plutonic complex was suggested by Reamsbottom (1971) based on observation of porphyritic texture and miarolitic cavities in less deformed parts. Our finding of zoned garnet (published Fig. 3) with a core of low pressure origin (2-3 kilobars) in pelitic country rock at the southern BPC contact also suggests shallow intrusion.

#### Urquhart pluton

The rock body we have defined here as the Urquhart pluton (published Fig. 4) was mapped by Roddick and Hutchinson (1969) as part of the Spuzzum pluton. The present study shows that the pluton body in question is separated from the Scuzzy pluton to the north by a schist septum and has fabric concentric about a different center. Therefore we give this body a separate name, the Urquhart pluton, after Mount Urquhart, an impressive spire within the pluton.

Trajectories of magmatic foliations in the Urquhart pluton define a mostly concentric pattern in map view, parallel to the edge of the pluton and parallel also to metamorphic foliations in the strain aureole (published Fig. 4A). Foliation dips steeply inward on the north and east sides, and moderately inward (30 - 50°) on the west and south sides, parallel to the pluton contact in the vertical dimension as in plan view (published Fig. 4A; DR Fig. 5). Foliation is notably more strongly developed along the margins of the pluton than in the core. Foliations in the outer part of the pluton are interpreted to represent flow of crystal mush controlled by the pluton margin. Foliation in the southern part of the pluton core forms a macroscopic plunging syncline.

Magmatic lineation in the Urquhart pluton, defined primarily by aligned hornblende, is best developed along the west and south margins where it has a down-dip orientation, trending toward the pluton core (published Fig. 4B). Lineation is subvertical along the northern and eastern sides of the pluton. The marginal lineations are parallel to metamorphic mineral lineations in the inner strain aureole of the pluton (see below) and are reasonably interpreted to represent displacement direction of crystal-laden magma (e.g. Guillet and Bouchez, 1983; Cruden, 1990; Nicolas, 1992). In the core area, the magmatic lineation is mostly shallow, trending NW-SE, lying in steeply dipping foliation surfaces. This lineation could be interpreted to represent lateral flow of magma (e.g. Tobisch and Cruden, 1995), or alternatively tectonic deformation of crystal mush (e.g. Yoshinobu and Paterson, 1996), discussed below.

Local mafic hornblende-rich layers and felsic plagioclase-rich layers, one to several centimeters thick and traceable for a few meters, are apparently of magmatic origin. Fine-grained, dark dioritic inclusions, not highly strained, are readily found but are sparse.

The transition from country rock into the Urquhart pluton is characterized as follows: 1) First is a one to two kilometer wide injection/migmatite complex in which pelitic schists are host to a heterogeneous assemblage of mainly centimeter to meter thick felsic tonalite-granodiorite dikes and sills. 2) Next, is a sill complex a few hundred meters wide that consists of sheets of the distinctive Urquhart quartz diorite a few tens of meters thick alternating with screens of country rock ten or more meters thick. 3) Inward from the sill complex, the pluton is mostly continuous, but large concordant country rock screens occur locally along the western flank 2 to 3 kilometers from the pluton margin, suggesting that a significant thickness of the outer part of the pluton is sheeted. More than a few kilometers from the rim, the pluton is relatively homogeneous.

Crystallization temperatures of the Urquhart pluton, derived from coexisting plagioclase and hornblende (see above) are ~700° in a broad core area and 640° - 660° on the rim (DR Table 1). Along one transect at the western edge of the pluton, temperature measured in nine samples distributed over a distance of 2 kilometers increases continuously inward from 640° to 700°. Pressures throughout most of the pluton, based on Al-in-hornblende, are in the range of 5 to 6 kilobars (published Fig. 4B). Lower pressures, in the range of 3.8 to 4.3 kilobars, were measured along the western rim of the pluton; other parts of the rim give higher pressures, comparable to

those measured in the core. Confirmation that this variation of rim pressures is real comes from corresponding aureole pressures, described below.

Lineation patterns in the Urquhart aureole are complex. In a band next to the pluton, mostly one kilometer or less wide, weakly to moderately developed mineral lineation defined by andalusite (pseudomorphed) and sillimanite prisms plunges northeast, parallel to magmatic lineations in the adjacent pluton (published Fig 4B). Outside this belt, but still within the strain aureole, andalusite, sillimanite, and kyanite are weakly aligned northwest-southeast, at a high angle to lineations in the inner belt. Concordance of the lineations in the inner strain aureole with magmatic lineations in the rim of the pluton suggests that these represent the movement direction of magma at the contact of the pluton (as stated above).

We do not have a good explanation for the origin of the northwest trending lineations in the outer strain aureole. Possibilities are that they represent: 1) regional strain developed in the aureole due to thermal weakening, or 2) displacement of country rock parallel to movement of a sheet of magma some distance above. The northwest trending lineations in the outer strain aureole have approximately the same attitude as magmatic lineations in the core zone of the Urquhart pluton, the origin of which could be attributable to either lateral magmatic flow or regional tectonics (see above). Parallelism of the outer aureole lineations and the pluton core lineations suggests a common origin. Regional tectonics would seem to be the most likely process that could be common to both sets of structure. In support of this conclusion, NW-SE trending mineral and stretching lineations of the possibly coeval D4 regional tectonic event exist outside the Urquhart strain aureole. If this interpretation is correct, the regional strain must be considered to have been weak, not strong enough to cause solid-state deformation of the pluton as it cooled, or of the inner strain aureole of the country rock once it had crystallized under the influence of the marginal phase of the pluton.

#### Tikwalus Creek pluton

The Tikwalus Creek pluton is newly defined (published Fig. 4). This body is physically continuous with the Scuzzy pluton but can be distinguished based on composition and internal structure. The Tikwalus pluton consists of a complex of sills tens of meters thick separated by metamorphic screens. All planar structures, including magmatic fabric in the sills, metamorphic fabric in country rock, and intrusive contacts of the sills are nearly vertical and northwest striking. Details of the internal structure of the Tikwalus pluton have not been mapped. The fabric of this body strikes into and is cut off by the Scuzzy pluton. No U-Pb zircon age is available.

#### Big Silver pluton

The Big Silver pluton (published Fig. 3) was previously termed the Clear Creek Orthogneiss by Brown and Walker (1993), but is renamed here after its exposure in Big Silver Creek in light of further study because: 1) its fabric is not gneissic but magmatic and 2) the large Triassic orthogneiss body that dominates the upper Clear Creek drainage is more appropriately given this name. The Big Silver pluton is about 0.5 kilometers thick, and is more than 25 kilometers long, extending north outside the map area. This pluton is a composite of many rock types ranging from diorite to tonalite. The Big Silver pluton is a vertical dike intruded into, and slightly across, folded country rock terranes (published Fig. 2). A U-Pb zircon age of  $91.4 \pm 0.8$  Ma was determined by Brown and Walker (1993) for rock at the south end of the body.

#### Mount Mason pluton

The Mount Mason pluton (published Fig. 3) is a large ovoid body (~10 X 30 kilometers) extending far beyond our study area to the northwest. A U-Pb zircon age of  $91.5 \pm 2$  Ma was determined by Friedman and others (1992). Magmatic foliation is parallel to the contact at south end of the pluton, dipping 50-60 degrees under the pluton. Pronounced magmatic lineation has a down-dip orientation. A strain aureole less than one kilometer wide is indicated by deflection of regional structures. Sillimanite prisms in the strain aureole are parallel to magmatic lineation in the pluton.

## Scuzzy pluton

Extending several kilometers out into country rock from the main body of the Scuzzy pluton, is an injection complex defined by pegmatite dikes and sills which comprise 10 to 50% of the country rock. Some of these bodies are tens of meters thick. Vein and layered migmatites (Mehnert, 1968) are intensely developed within a kilometer of the pluton.

Al-in-hornblende pressures in the outer zone of the Scuzzy pluton range from 4.4 - 7.7 kilobars, with the great majority being 5 - 5.5 kilobars (Fig 10). Plagioclase-hornblende temperatures are 700 to 750°C (DR Table 1).

U-Pb isotope partial dissolution results from the a northeastern rim sample (DR Fig. 3f) are similar to the results from the southwestern rim sample described in the published text (published Fig. 7c) but did not produce a concordant intermediate step. Thus, although similarities in zircon ages and systematics suggest the two rim samples are comparable in age, a precise age interpretation for the northeastern sample is not permissible. The interpreted age for the southwestern sample ( $89.8 \pm 1.0$  Ma) is consistent with an age of  $87 \pm 2$  Ma interpreted from marginally concordant conventional fractions reported by Brown and Walker (1993, "Scuzzy Southwest").

Strain is manifest in Settler Schist by boudinaged and folded intrusive phases in the migmatitic border zone up to one kilometer from the Scuzzy pluton. Early formed andalusite porphyroblasts, now pseudomorphed by sillimanite, are in some places randomly oriented and in other places moderately aligned in a steep lineation. Foliation wraps the andalusite porphyroclasts and locally contains aligned sillimanite, but original shapes of andalusite grains are mostly preserved (DR Fig. 6B). On the northeast side of the pluton, meta-conglomerates show no relation of degree of strain to distance from the pluton and are inferred to have acquired their strain during earlier tectonic events; within one to two kilometers of the pluton, the meta-conglomerates and interbedded schists display mesoscopic secondary folds with a weak axial plane foliation (Alvarez, 1997).

## References Cited

- Alvarez, K.M., 1997, Structure and metamorphism of the Kwoiek Creek area [M.S. thesis]: Western Washington University, Bellingham Washington, 141 p.
- Anderson, J.L. and Smith, D.R., 1995, The effect of temperature and oxygen fugacity on Al-in-hornblende barometry: *American Mineralogist*, v. 80, p. 549-559.
- Bennett, J.D., 1989, Timing and conditions of deformation and metamorphism of the structural packages east of Harrison Lake, B.C., [M.S. Thesis]: Bellingham, Western Washington University, 87p.
- Berman, R.G., 1990, Mixing properties of Ca-Mg-Fe-Mn garnets: *American Mineralogist*, v. 75, p. 328-344.
- Berman, R.G., 1991, Thermobarometry using multi-equilibrium calculations: a new technique, with petrologic applications: *Canadian Mineralogist*, v. 29, p. 833-855.
- Brown, E.H. and Burmester, R.F., 1991, Metamorphic evidence for tilt of the Spuzzum pluton: diminished basis for the "Baja British Columbia" concept: *Tectonics*, v. 10, p. 978-985.
- Brown, E.H. and Walker, N.W., 1993, A magma loading model for Barrovian metamorphism in the southeast Coast Plutonic Complex, British Columbia and Washington: *Geological Society of America Bulletin*, v. 105, p. 479-500.
- Cruden, A.R., 1990, Flow and fabric development during the diapiric rise of magma: *Journal of Geology*, v. 98, p. 681-698.
- Friedman, R.M., Tyson, T.M. and Journeay, J.M., 1992, U-Pb age of the Mt Mason pluton in the Cairn Needle area, southern Coast Belt, British Columbia: *Current Research, part A. Geological Survey of Canada*, v. Paper 92-1A, p. 261-266.

- Fuhrman, M.L. and Lindsley, D.H., 1988, Ternary feldspar modeling and thermometry: *American Mineralogist*, v. 73, p. 201-215.
- Guillet, P., Bouchez, J. and Vigneress, J.L., 1983, Anisotropy of magmatic susceptibility and magmatic structure in the Guerande granite massif (France): *Tectonics*, v. 2, p. 419-429.
- Holland, T.J.B. and Blundy, J.D., 1994, Non-ideal interactions in calcic amphiboles and their bearing on amphibole-plagioclase thermometry: *Contributions to Mineralogy and Petrology*, v. 116, p. 433-447.
- Hollister, L.S., Grissom, G.C., Peters, E.K., Stowell, H.H. and Sisson, V.B., 1987, Confirmation of the empirical correlation of Al in hornblende with pressure of solidification of calc-alkaline plutons: *American Mineralogist*, v. 72, p. 231-239.
- Johnson, M.C. and Rutherford, M.J., 1989, Experimental calibration of the aluminum-in-hornblende geobarometer with application to Long Valley caldera (California) volcanic rocks: *Geology*, v. 17, p. 837-841.
- Journeay, J.M. and Friedman, R.M., 1993, The Coast Belt thrust system: evidence of Late Cretaceous shortening in southwest British Columbia: *Tectonics*, v. 12, p. 756-775.
- Ludwig, K.R., 1992, Isoplot: A plotting and regression program for radiogenic-isotopic data, version 2.57: U.S. Geological Survey Open File Report 91-445.
- Mattinson, J.M., 1973, Anomalous isotope composition of lead in young zircons: *Carnegie Institution Yearbook* 72, p. 613-616.
- Mattinson, J.M., 1987, U-Pb ages of zircons: a basic examination of error propagation: *Chemical Geology*, v. 66, p. 151-162.
- Mattinson, J.M., 1994, A study of complex disorder in zircons using stepwise dissolution techniques: *Contributions to Mineralogy and Petrology*, v. 116, p. 117-129.
- McClelland, W.C. and Mattinson, J.M., 1996, Resolving high precision U-Pb ages from Tertiary plutons with complex zircon systematics: *Geochimica et Cosmochimica Acta*, v. 60, p. 3955-3965.
- McMullen, D.W., Berman, R.G. and Greenwood, H.J., 1991, Calibration of the SGAM thermobarometer for pelitic rocks using data from phase-equilibrium experiments and natural assemblages: *Canadian Mineralogist*, v. 29, p. 889-908.
- Mehnert, K.R., 1968, Migmatites and the origin of granitic rocks: Amsterdam, Elsevier, 393p.
- Monger, J.W.H., 1989, Geology of Hope and Ashcroft map areas, British Columbia, Maps 41-1989 and 42-1989, 1:250,000: Geological Survey of Canada.
- Parrish, R.R., 1990, U-Pb dating of monazite and its application to geological problems: *Canadian Journal of Earth Sciences*, v. 27, p. 1431-1450.
- Nicolas, A., 1992, Kinematics in magmatic rocks with special reference to gabbros: *Journal of Petrology*, v. 33, p. 891-915.
- Reamsbottom, S.B., 1971, The geology of the Mount Breakenridge area, Harrison Lake, B.C., [M.Sc. Thesis]: University of British Columbia, Vancouver, B.C., 162 p.
- Reamsbottom, S.B., 1974, Geology and metamorphism of the Mount Breakenridge area, Harrison Lake, British Columbia, [Ph.D. Thesis]: University of British Columbia, Vancouver, B.C., 155p.
- Roddick, J.A. and Hutchinson, W.W., 1969, Northwestern part of Hope map-area, British Columbia [92H (west half)]: Geological Survey of Canada Paper 69-1A, p. 29-38.
- Scharer, U., 1984, The effect of initial  $^{230}\text{Th}$  disequilibrium in young U-Pb ages: the Makalu case, Himalaya: *Earth and Planetary Science Letters*, v. 67, p. 191-204.
- Schmidt, M.W., 1992, Amphibole composition in tonalite as a function of pressure: an experimental calibration of the Al-in-hornblende barometer: *Contributions to Mineralogy and Petrology*, v. 110, p. 304-310.
- Stacey, J.S. and Kramers, J.D., 1975, Approximation of terrestrial lead isotope evolution by a two-stage model: *Earth and Planetary Science Letters*, v. 26, p. 207-221.
- Tobisch, O.T. and Cruden, A.R., 1995, Fracture-controlled magma conduits in an obliquely convergent continental magmatic arc: *Geology*, v. 23, p. 941-944.
- Yoshinobu, A. and Paterson, S.R., 1996, Fracture-controlled magma conduits in an obliquely convergent continental magmatic arc: comment: *Geology*, v. 24, p. 669-670.

## Figure Captions

DR Figure 1. Localities of thermobarometric samples listed in DR Table 1.

A. Samples in the vicinity of the Urquhart pluton.

B. Samples in the vicinity of the Scuzzy pluton.

DR Figure 2. Modal composition of plutons based on point count analyses of stained slabs, ~1000 points/sample. K-feldspar is in trace amount or absent in all samples except those shown on DR Fig 1B. Mafics are biotite and/or hornblende in most samples.

A. Quartz - plagioclase - mafics plot of sparsely sampled plutons.

B. Quartz - plagioclase - K-feldspar plot of the Breakenridge and Scuzzy plutons.

C. Quartz-plagioclase-mafics plot in abundantly sampled plutons. Numbers of samples: Scuzzy core 40, Scuzzy rim 41, Urquhart 98, Tikwalus Ck 37.

DR Figure 3. U-Pb concordia diagrams for dated samples. Analytical data presented in DR Table 2. See published paper and repository text for discussion.

DR Figure 4. Photo of outcrop-scale, sheeted injection complex of the Breakenridge Plutonic Complex. Light rock is tonalite, dark rock is diorite. This rock has solid-state fabric. Knife in the center of photo provides a scale.

DR Figure 5. Map trace across topography of the moderately inward dipping south contact of the Urquhart pluton.

A. Map of part of the south contact of the Urquhart pluton. Areas of pattern show observed outcrops. The attitude of the contact of the pluton determined from its trace across topography is similar to the attitude of magmatic and metamorphic foliations measured nearby in the pluton and country rock respectively. Contour interval is 500 feet.

B. Location map for DR 5A.

DR Figure 6. Early contact metamorphic andalusite, now pseudomorphed by sillimanite.

A. View on foliation surface of randomly oriented andalusite in the aureole of the Urquhart pluton. The andalusite post-dates the quartz rod lineation and provides evidence for relatively low strain during development of the Urquhart aureole. Hammer for scale.

B. Photomicrograph of pseudomorphed andalusite. View down c-axis. The andalusites are pseudomorphed by sillimanite such that a single crystal of andalusite is replaced by a topotactic, multi-crystal aggregate of sillimanite; the c-axes of a bundle of sillimanite needles are parallel to the original c-axis of andalusite. A faint relict chiastolite cross is preserved. Foliation wraps the andalusite. The original crystal form is well preserved, indicating an absence of strong penetrative strain subsequent to andalusite crystallization. This sample is from the aureole of the Scuzzy pluton.

DR Figure 7. Sheeted margin of the Scuzzy pluton in the vicinity of Big Silver Creek.

A. Detailed Map. Note: 1) outlying sill, composed of plutonic rock similar to that in the main body of the pluton, 2) zone of trains of country rock screens and pluton sheets within the main mass of the pluton. "PHOTO" gives the locality of the screen/sheet complex shown in Fig. 10 of the published paper. Foliation symbols as in Fig. 9 of the published paper.

B. Location of DR Fig. 7A.

DR Table 1 Compositions of Minerals used for Thermobarometry

| Map Number                     | 1         |       |       |       | 2            |      |      | 3            |       |       |       | 4            |       |       |
|--------------------------------|-----------|-------|-------|-------|--------------|------|------|--------------|-------|-------|-------|--------------|-------|-------|
| Field Number                   | 162-196   |       |       |       | 164-231      |      |      | 164-228      |       |       |       | 117-2        |       |       |
| Rock Unit                      | SL        |       |       |       | SE           |      |      | SE           |       |       |       | SE           |       |       |
| Reference                      | 4         |       |       |       | 2            |      |      | 1            |       |       |       | 1            |       |       |
| Mineral                        | GA        | BI    | MU    | PL    | GA           | BI   | PL   | GA           | BI    | MU    | PL    | GA           | BI    | PL    |
| Wt% Oxide SiO <sub>2</sub>     | 36.7      | 35.53 | 45.1  | 61.6  |              |      |      | 36.3         | 36.1  | 44.8  | 56.6  | 36.8         | 34.7  | 60.0  |
| TiO <sub>2</sub>               | 0.00      | 1.48  | 0.5   |       |              |      |      | 0.05         | 1.58  | 0.56  |       | 0.03         | 2.39  |       |
| Al <sub>2</sub> O <sub>3</sub> | 20.9      | 18.2  | 35.0  | 24.08 |              |      |      | 20.7         | 17.9  | 32.9  | 24.7  | 21.1         | 19.3  | 25.0  |
| FeO                            | 33.0      | 19.8  | 1.20  | 0.09  |              |      |      | 30.5         | 17.4  | 0.94  |       | 33.2         | 18.5  |       |
| MnO                            | 3.89      | 0.03  | 0.00  |       |              |      |      | 5.55         | 0.01  | 0.00  |       | 1.71         | 0.03  |       |
| MgO                            | 2.74      | 9.88  | 0.70  |       |              |      |      | 2.73         | 11.9  | 0.74  |       | 4.06         | 10.4  |       |
| CaO                            | 1.73      |       |       | 5.28  |              |      |      | 2.26         |       |       | 6.72  | 2.32         |       | 6.60  |
| Na <sub>2</sub> O              |           | 0.06  | 1.48  | 8.60  |              |      |      |              | 0.24  | 1.60  | 7.82  |              | 0.30  | 7.99  |
| K <sub>2</sub> O               |           | 9.06  | 8.51  | 0.05  |              |      |      |              | 8.07  | 8.5   | 0.06  |              | 8.67  | 0.06  |
| Total                          | 98.9      | 94.03 | 92.4  | 99.7  |              |      |      | 97.8         | 92.2  | 90.0  | 95.9  | 99.2         | 94.3  | 99.7  |
| Cations Si                     | 2.99      | 5.48  | 6.14  | 2.74  | 2.98         | 5.95 |      | 2.97         | 5.55  | 6.26  | 2.64  | 2.97         | 5.79  | 2.68  |
| Ti                             | 0.00      | 0.172 | 0.050 |       |              | 0.22 |      | 0.003        | 0.183 | 0.059 |       |              | 0.30  |       |
| Al                             | 2.01      | 3.31  | 5.61  | 1.26  | 2.00         | 3.78 |      | 2.000        | 3.25  | 5.42  | 1.36  | 2.01         | 3.79  | 1.32  |
| Fe                             | 2.25      | 2.55  | 0.14  | 0.003 | 2.20         | 2.33 |      | 2.20         | 2.11  | 0.110 |       | 2.24         | 2.58  |       |
| Mn                             | 0.269     | 0.004 | 0.00  |       | 0.03         |      |      | 0.062        | 0.001 | 0.000 |       | 0.11         | 0.003 |       |
| Mg                             | 0.333     | 2.27  | 0.14  |       | 0.43         | 2.83 |      | 0.457        | 2.73  | 0.154 |       | 0.49         | 2.59  |       |
| Ca                             | 0.151     |       |       | 0.252 | 0.40         |      | 0.34 | 0.347        |       |       | 0.336 | 0.21         |       | 0.316 |
| Na                             |           | 0.018 | 0.39  | 0.742 |              | 0.05 | 0.67 |              | 0.072 | 0.435 | 0.707 |              | 0.100 | 0.692 |
| K                              |           | 1.78  | 1.48  | 0.003 |              | 1.59 |      |              | 1.58  | 1.52  | 0.004 |              | 1.85  | 0.004 |
| Temperature °C                 | 575, GABI |       |       |       | 603, GABI    |      |      | 613, GABI    |       |       |       | 625, GABI    |       |       |
| Pressure, kilobars             | 4.6, GAMI |       |       |       | 7.9, GASP-Ky |      |      | 7.7, GASP-Ky |       |       |       | 7.1, GASP-Ky |       |       |



Table 1 Compositions of Minerals used for Thermobarometry

| Map Number                     | 5            |      |      | 6            |      |      | 7         |       |       |       | 8            |       |      |
|--------------------------------|--------------|------|------|--------------|------|------|-----------|-------|-------|-------|--------------|-------|------|
| Field Number                   | 164-233D     |      |      | P3           |      |      | 179-MN31  |       |       |       | 164-258F     |       |      |
| Rock Unit                      | SE           |      |      | SE           |      |      | SE        |       |       |       | SE           |       |      |
| Reference                      | 2            |      |      | 5            |      |      | 1         |       |       |       | 2            |       |      |
| Mineral                        | GA           | BI   | PL   | GA           | BI   | PL   | GA        | BI    | MU    | PL    | GA           | BI    | PL   |
| Wt% Oxide SiO <sub>2</sub>     |              |      |      |              |      |      | 37.2      | 36.8  | 50.3  | 61.2  |              |       |      |
| TiO <sub>2</sub>               |              |      |      |              |      |      |           | 1.58  | 0.40  |       |              |       |      |
| Al <sub>2</sub> O <sub>3</sub> |              |      |      |              |      |      | 20.6      | 19.3  | 38.8  | 24.4  |              |       |      |
| FeO                            |              |      |      |              |      |      | 35.3      | 19.1  | 1.20  | 0.06  |              |       |      |
| MnO                            |              |      |      |              |      |      | 0.55      |       |       |       |              |       |      |
| MgO                            |              |      |      |              |      |      | 2.75      | 10.5  | 0.67  |       |              |       |      |
| CaO                            |              |      |      |              |      |      | 2.97      |       |       | 5.59  |              |       |      |
| Na <sub>2</sub> O              |              |      |      |              |      |      |           | 0.16  | 0.92  | 8.68  |              |       |      |
| K <sub>2</sub> O               |              |      |      |              |      |      |           | 8.18  | 8.08  | 0.05  |              |       |      |
| Total                          |              |      |      |              |      |      | 99.3      | 95.6  | 100.3 | 100.0 |              |       |      |
| Cations Si                     | 3.00         | 5.86 |      | 2.95         | 5.44 |      | 3.01      | 5.50  | 6.22  | 2.72  | 2.97         | 5.80  |      |
| Ti                             |              | 0.25 |      |              | 0.20 |      |           | 0.178 | 0.037 |       |              | 0.303 |      |
| Al                             | 1.98         | 3.87 |      | 2.04         | 3.48 |      | 1.97      | 3.41  | 5.66  | 1.28  | 2.01         | 3.87  |      |
| Fe                             | 2.22         | 2.27 |      | 2.24         | 2.15 |      | 2.39      | 2.39  | 0.12  | 0.002 | 2.20         | 2.51  |      |
| Mn                             | 0.13         | 0.01 |      | 0.13         |      |      | 0.038     |       |       |       | 0.150        | 0.01  |      |
| Mg                             | 0.48         | 2.77 |      | 0.43         | 2.50 |      | 0.332     | 2.34  | 0.12  |       | 0.500        | 2.56  |      |
| Ca                             | 0.22         |      | 0.30 | 0.23         |      |      | 0.258     |       |       | 0.266 | 0.181        |       | 0.32 |
| Na                             |              | 0.10 | 0.70 |              | 0.07 | 0.32 |           | 0.046 | 0.221 | 0.747 |              | 0.05  | 0.68 |
| K                              |              | 1.77 |      |              | 1.67 | 0.70 |           | 1.56  | 1.276 | 0.003 |              | 1.74  |      |
| Temperature °C                 | 591, GABI    |      |      | 584, GABI    |      |      | 558, GABI |       |       |       | 661, GABI    |       |      |
| Pressure, kilobars             | 6.0, GASP-Ky |      |      | 5.9, GASP-Ky |      |      | 6.0, GAMI |       |       |       | 6.4, GASP-Si |       |      |

Table 1 Compositions of Minerals used for Thermobarometry

| Map Number         |                                | 9            |      |      | 10        |       | 11        |       | 12         |       | 13        |       | 14        |       |
|--------------------|--------------------------------|--------------|------|------|-----------|-------|-----------|-------|------------|-------|-----------|-------|-----------|-------|
| Field Number       |                                | 164-258H     |      |      | 164-259   |       | 179-AH19  |       | 164-435    |       | 179-AH23  |       | 179-AH35  |       |
| Rock Unit          |                                | SE           |      |      | UP        |       | UP        |       | UP         |       | UP        |       | UP        |       |
| Reference          |                                | 2            |      |      | 1,2       |       | 1         |       | 1,2        |       | 1         |       | 1         |       |
| Mineral            |                                | GA           | BI   | PL   | HB        | PL    | HB        | PL    | HB         | PL    | HB        | PL    | HB        | PL    |
| Wt% Oxide          | SiO <sub>2</sub>               |              |      |      | 44.4      | 60.2  | 43.2      | 57.7  | 47.3       | 60.1  | 45.7      | 57.9  | 46.9      | 58.5  |
|                    | TiO <sub>2</sub>               |              |      |      | 1.14      |       | 1.08      |       | 1.17       |       | 1.09      |       | 1.08      |       |
|                    | Al <sub>2</sub> O <sub>3</sub> |              |      |      | 11.8      | 24.8  | 12.02     | 25.0  | 8.81       | 24.8  | 10.08     | 25.2  | 8.37      | 24.8  |
|                    | FeO                            |              |      |      | 15.6      |       | 15.73     |       | 14.3       |       | 15.7      | 0.06  | 16.0      |       |
|                    | MnO                            |              |      |      | 0.34      |       | 0.33      |       | 0.37       |       | 0.44      |       | 0.43      |       |
|                    | MgO                            |              |      |      | 12.2      |       | 10.97     |       | 12.5       |       | 11.7      |       | 12.0      |       |
|                    | CaO                            |              |      |      | 11.0      | 6.73  | 11.02     | 6.66  | 11.8       | 6.85  | 10.6      | 6.97  | 10.9      | 6.56  |
|                    | Na <sub>2</sub> O              |              |      |      | 1.58      | 7.76  | 1.71      | 7.71  | 1.08       | 7.68  | 1.33      | 7.64  | 1.20      | 7.84  |
|                    | K <sub>2</sub> O               |              |      |      | 0.44      | 0.08  | 0.56      | 0.11  | 0.51       | 0.009 | 0.43      | 0.10  | 0.39      | 0.14  |
|                    | Total                          |              |      |      | 98.5      | 99.6  | 96.7      | 97.1  | 97.8       | 99.4  | 97.1      | 97.9  | 97.2      | 97.9  |
|                    |                                |              |      |      |           |       |           |       |            |       |           |       |           |       |
| Cations            | Si                             | 3.00         | 5.86 |      | 6.37      | 2.69  | 6.41      | 2.65  | 6.87       | 2.69  | 6.71      | 2.64  | 6.90      | 2.67  |
|                    | Ti                             |              | 0.28 |      | 0.123     |       | 0.12      |       | 0.128      |       | 0.12      |       | 0.119     |       |
|                    | Al                             | 2.01         | 3.88 |      | 1.99      | 1.31  | 2.10      | 1.35  | 1.51       | 1.31  | 1.75      | 1.35  | 1.45      | 1.33  |
|                    | Fe <sub>3</sub>                |              |      |      | 1.131     |       | 0.596     |       | 0.383      |       | 0.530     |       | 0.475     |       |
|                    | Fe <sub>2</sub>                | 2.20         | 0.30 |      | 0.739     |       | 1.358     |       | 1.36       |       | 1.40      | 0.002 | 1.49      |       |
|                    | Mn                             | 0.10         | 0.01 |      | 0.041     |       | 0.042     |       | 0.046      |       | 0.055     |       | 0.054     |       |
|                    | Mg                             | 0.51         | 2.65 |      | 2.61      |       | 2.43      |       | 2.71       |       | 2.56      |       | 2.62      |       |
|                    | Ca                             | 0.18         |      | 0.31 | 1.69      | 0.322 | 1.75      | 0.328 | 1.84       | 0.328 | 1.67      | 0.341 | 1.72      | 0.320 |
|                    | Na                             |              | 0.07 | 0.69 | 0.439     | 0.672 | 0.492     | 0.687 | 0.305      | 0.666 | 0.379     | 0.676 | 0.334     | 0.693 |
|                    | K                              |              | 1.84 |      | 0.080     | 0.005 | 0.106     | 0.006 | 0.095      | 0.001 | 0.081     | 0.006 | 0.073     | 0.008 |
|                    |                                |              |      |      |           |       |           |       |            |       |           |       |           |       |
| Temperature °C     |                                | 624, GABI    |      |      | 745, HBPL |       | 717, HBPL |       | 662, HBPL  |       | 683, HBPL |       | 675, HBPL |       |
| Pressure, kilobars |                                | 5.9, GASP-Si |      |      | 5.3, ALHB |       | 6.3, ALHB |       | 4.29, ALHB |       | 5.2, ALHB |       | 3.9, ALHB |       |

Table 1 Compositions of Minerals used for Thermobarometry

| Map Number                     | 15           |      |      | 16           |      |      | 17           |       |       | 18           |       |       | 19        |       |
|--------------------------------|--------------|------|------|--------------|------|------|--------------|-------|-------|--------------|-------|-------|-----------|-------|
| Field Number                   | JT 88-05     |      |      | 162-192      |      |      | 164-460      |       |       | 179-NB125    |       |       | 179-NB132 |       |
| Rock Unit                      | SE           |      |      | SE           |      |      | SE           |       |       | SE           |       |       | UP        |       |
| Reference                      | 2            |      |      | 2,4          |      |      | 1            |       |       | 1            |       |       | 1         |       |
| Mineral                        | GA           | BI   | PL   | GA           | BI   | PL   | GA           | BI    | PL    | GA           | BI    | PL    | HB        | PL    |
| Wt% Oxide SiO <sub>2</sub>     |              |      |      |              |      |      | 37.5         | 35.3  | 60.6  | 37.6         | 35.0  | 59.6  | 48.0      | 58.8  |
| TiO <sub>2</sub>               |              |      |      |              |      |      |              | 1.82  |       |              | 2.26  |       | 1.01      |       |
| Al <sub>2</sub> O <sub>3</sub> |              |      |      |              |      |      | 21.2         | 18.9  | 24.7  | 21.4         | 18.1  | 25.1  | 8.23      | 25.5  |
| FeO                            |              |      |      |              |      |      | 33.6         | 17.25 |       | 32.8         | 16.9  |       | 15.2      |       |
| MnO                            |              |      |      |              |      |      | 1.29         | 0.00  |       | 1.09         | 0.00  |       | 0.47      |       |
| MgO                            |              |      |      |              |      |      | 4.48         | 11.0  |       | 5.21         | 11.1  |       | 12.4      |       |
| CaO                            |              |      |      |              |      |      | 1.43         |       | 6.37  | 1.24         |       | 6.73  | 11.1      | 7.38  |
| Na <sub>2</sub> O              |              |      |      |              |      |      |              | 0.24  | 7.99  |              | 0.24  | 7.77  | 1.05      | 7.32  |
| K <sub>2</sub> O               |              |      |      |              |      |      |              | 8.63  | 0.06  |              | 9.18  | 0.13  | 0.40      | 0.12  |
| Total                          |              |      |      |              |      |      | 99.5         | 93.1  | 99.8  | 99.4         | 92.7  | 99.3  | 97.9      | 99.1  |
| Cations Si                     | 2.97         | 5.66 |      | 2.96         | 5.70 |      | 3.00         | 5.67  | 2.70  | 3.00         | 5.42  | 2.67  | 6.93      | 2.65  |
| Ti                             |              | 0.28 |      |              | 0.24 |      |              | 0.220 |       |              | 0.263 |       | 0.11      |       |
| Al                             | 2.00         | 3.40 |      | 2.00         | 3.52 |      | 2.00         | 3.58  | 1.30  | 2.01         | 3.30  | 1.33  | 1.40      | 1.35  |
| Fe <sub>3</sub>                |              |      |      |              |      |      |              |       |       |              |       |       | 0.72      |       |
| Fe <sub>2</sub>                | 2.19         | 2.48 |      | 2.20         | 2.25 |      | 2.25         | 2.32  |       | 2.19         | 2.19  |       | 1.12      |       |
| Mn                             | 0.21         | 0.01 |      | 0.20         | 0.01 |      | 0.088        |       |       | 0.074        |       |       | 0.06      |       |
| Mg                             | 0.52         | 2.58 |      | 0.42         | 2.70 |      | 0.535        | 2.63  |       | 0.619        | 2.55  |       | 2.67      |       |
| Ca                             | 0.140        |      | 0.33 | 0.27         |      | 0.39 | 0.123        |       | 0.304 | 0.106        |       | 0.323 | 1.72      | 0.356 |
| Na                             |              | 0.05 | 0.67 |              | 0.06 | 0.62 |              | 0.074 | 0.690 |              | 0.072 | 0.676 | 0.29      | 0.639 |
| K                              |              | 1.85 |      |              | 1.69 |      |              | 1.77  | 0.003 |              | 1.81  | 0.007 | 0.07      | 0.007 |
| Temperature, °C                | 667, GABI    |      |      | 572, GABI    |      |      | 632, GABI    |       |       | 684, GABI    |       |       | 652, HBPL |       |
| Pressure, kilobars             | 5.0, GASP-Si |      |      | 5.4, GASP-Ky |      |      | 4.4, GASP-Si |       |       | 4.4, GASP-Si |       |       | 3.8, ALHB |       |

Table 1 Compositions of Minerals used for Thermobarometry

| Map Number                     | 20        |       | 21        |       | 22         |       | 23        |       | 24        |       | 25        |       | 26        |       |
|--------------------------------|-----------|-------|-----------|-------|------------|-------|-----------|-------|-----------|-------|-----------|-------|-----------|-------|
| Field Number                   | 179-NB123 |       | 179-NB120 |       | 176-137    |       | 176-209   |       | 176-115   |       | 176-116   |       | 176-119   |       |
| Rock Unit                      | UP        |       | UP        |       | UP         |       | UP        |       | UP        |       | UP        |       | UP        |       |
| Reference                      | 1         |       | 1         |       | 1          |       | 1         |       | 1         |       | 1         |       | 1         |       |
| Mineral                        | HB        | PL    | HB        | PL    | HB         | PL    | HB        | PL    | HB        | PL    | HB        | PL    | HB        | PL    |
| Wt% Oxide SiO <sub>2</sub>     | 46.7      | 57.3  | 46.0      | 59.1  | 45.3       | 59.1  | 44.6      | 60.6  | 45.9      | 58.6  | 45.1      | 59.5  | 45.3      | 60.8  |
| TiO <sub>2</sub>               | 0.93      |       | 0.65      |       | 0.88       |       | 0.93      |       | 0.81      |       | 0.82      |       | 0.87      |       |
| Al <sub>2</sub> O <sub>3</sub> | 9.92      | 26.5  | 10.6      | 25.5  | 11.5       | 25.9  | 11.2      | 24.6  | 11.7      | 26.1  | 11.5      | 25.4  | 11.0      | 24.7  |
| FeO                            | 15.9      |       | 16.2      |       | 15.9       |       | 16.0      |       | 14.3      |       | 16.1      |       | 15.8      |       |
| MnO                            | 0.29      |       | 0.32      |       | 0.31       |       | 0.30      |       | 0.21      |       | 0.28      |       | 0.35      |       |
| MgO                            | 12.4      |       | 12.0      |       | 12.0       |       | 11.5      |       | 12.5      |       | 12.0      |       | 11.3      |       |
| CaO                            | 10.1      | 8.53  | 10.1      | 7.14  | 10.2       | 7.83  | 11.3      | 6.50  | 10.7      | 7.62  | 10.3      | 7.40  | 11.6      | 6.44  |
| Na <sub>2</sub> O              | 1.17      | 6.84  | 1.31      | 7.42  | 1.44       | 7.20  | 1.61      | 7.79  | 1.56      | 7.30  | 1.56      | 7.40  | 1.34      | 7.82  |
| K <sub>2</sub> O               | 0.33      | 0.12  | 0.32      | 0.12  | 0.31       | 0.11  | 0.57      | 0.14  | 0.27      | 0.06  | 0.34      | 0.08  | 0.68      | 0.23  |
| Total                          | 97.7      | 99.3  | 97.5      | 99.3  | 97.8       | 100.1 | 98.0      | 99.6  | 98.0      | 99.7  | 98.0      | 99.8  | 98.2      | 100.0 |
| Cations Si                     | 6.66      | 2.59  | 6.60      | 2.65  | 6.47       | 2.64  | 6.49      | 2.70  | 6.56      | 2.63  | 6.45      | 2.66  | 6.60      | 2.70  |
| Ti                             | 0.100     |       | 0.070     |       | 0.095      |       | 0.102     |       | 0.09      |       | 0.088     |       | 0.09      |       |
| Al                             | 1.67      | 1.41  | 1.80      | 1.35  | 1.94       | 1.36  | 1.92      | 1.29  | 1.97      | 1.38  | 1.94      | 1.34  | 1.89      | 1.30  |
| Fe <sub>3</sub>                | 1.35      |       | 1.34      |       | 1.35       |       | 0.798     |       | 1.00      |       | 1.33      |       | 0.60      |       |
| Fe <sub>2</sub>                | 0.55      |       | 0.601     |       | 0.555      |       | 1.15      |       | 0.71      |       | 0.601     |       | 1.32      |       |
| Mn                             | 0.035     |       | 0.039     |       | 0.038      |       | 0.037     |       | 0.03      |       | 0.034     |       | 0.04      |       |
| Mg                             | 2.63      |       | 2.56      |       | 2.56       |       | 2.50      |       | 2.66      |       | 2.56      |       | 2.45      |       |
| Ca                             | 1.54      | 0.412 | 1.56      | 0.343 | 1.56       | 0.374 | 1.763     | 0.311 | 1.64      | 0.366 | 1.58      | 0.354 | 1.81      | 0.307 |
| Na                             | 0.32      | 0.598 | 0.364     | 0.646 | 0.399      | 0.622 | 0.455     | 0.674 | 0.43      | 0.634 | 0.421     | 0.641 | 0.38      | 0.674 |
| K                              | 0.060     | 0.007 | 0.059     | 0.007 | 0.057      | 0.006 | 0.106     | 0.008 | 0.05      | 0.003 | 0.062     | 0.004 | 0.13      | 0.013 |
| Temperature °C                 | 683, HBPL |       | 673, HBPL |       | 719, HBPL  |       | 714, HBPL |       | 680, HBPL |       | 718, HBPL |       | 678, HBPL |       |
| Pressure, kilobars             | 4.9, ALHB |       | 5.5, ALHB |       | 5.08, ALHB |       | 5.6, ALHB |       | 6.3, ALHB |       | 5.6, ALHB |       | 6.0, ALHB |       |

Table 1 Compositions of Minerals used for Thermobarometry

| Map Number                     | 27        |       | 28        |       | 29           |       |       | 30        |       | 31        |       | 32        |       |
|--------------------------------|-----------|-------|-----------|-------|--------------|-------|-------|-----------|-------|-----------|-------|-----------|-------|
| Field Number                   | 176-129   |       | 176-125   |       | 179-CB1      |       |       | 176-211   |       | 176-212   |       | 176-217   |       |
| Rock Unit                      | UP        |       | UP        |       | SE           |       |       | UP        |       | UP        |       | UP        |       |
| Reference                      | 1         |       | 1         |       | 1            |       |       | 1         |       | 1         |       | 1         |       |
| Mineral                        | HB        | PL    | HB        | PL    | GA           | BI    | PL    | HB        | PL    | HB        | PL    | HB        | PL    |
| Wt% Oxide                      |           |       |           |       |              |       |       |           |       |           |       |           |       |
| SiO <sub>2</sub>               | 45.3      | 59.6  | 45.5      | 59.8  | 36.2         | 35.7  | 58.3  | 46.3      | 60.3  | 46.7      | 59.9  | 44.3      | 60.7  |
| TiO <sub>2</sub>               | 0.93      |       | 0.88      |       | 0.04         | 2.44  |       | 0.81      |       | 0.76      |       | 1.00      |       |
| Al <sub>2</sub> O <sub>3</sub> | 11.4      | 25.1  | 11.3      | 25.1  | 20.1         | 19.2  | 26.1  | 10.9      | 25.1  | 9.98      | 25.2  | 11.00     | 24.6  |
| FeO                            | 15.1      |       | 15.2      |       | 36.7         | 18.9  | 0.04  | 15.5      |       | 15.2      |       | 15.8      |       |
| MnO                            | 0.30      |       | 0.31      |       | 0.75         | 0.04  |       | 0.30      |       | 0.30      |       | 0.28      |       |
| MgO                            | 12.2      |       | 11.7      |       | 2.18         | 10.3  |       | 12.3      |       | 12.6      |       | 11.7      |       |
| CaO                            | 10.4      | 7.33  | 10.7      | 7.17  | 3.75         |       | 7.74  | 10.4      | 6.30  | 10.9      | 7.02  | 11.4      | 6.45  |
| Na <sub>2</sub> O              | 1.66      | 7.49  | 1.58      | 7.48  |              | 0.20  | 7.14  | 1.51      | 8.03  | 1.40      | 7.58  | 1.52      | 7.85  |
| K <sub>2</sub> O               | 0.30      | 0.11  | 0.31      | 0.16  |              | 8.58  | 0.05  | 0.29      | 0.06  | 0.33      | 0.07  | 0.69      | 0.13  |
| Total                          | 97.6      | 99.6  | 97.5      | 99.7  | 99.8         | 95.2  | 99.4  | 98.3      | 99.8  | 98.2      | 99.8  | 97.7      | 99.7  |
| Cations                        |           |       |           |       |              |       |       |           |       |           |       |           |       |
| Si                             | 6.51      | 2.67  | 6.58      | 2.67  | 2.96         | 5.39  | 2.62  | 6.59      | 2.69  | 6.69      | 2.67  | 6.48      | 2.71  |
| Ti                             | 0.10      |       | 0.10      |       | 0.002        | 0.277 | 1.38  | 0.09      |       | 0.08      |       | 0.11      |       |
| Al                             | 1.93      | 1.32  | 1.93      | 1.32  | 1.94         | 3.41  |       | 1.83      | 1.32  | 1.68      | 1.33  | 1.90      | 1.29  |
| Fe <sub>3</sub>                | 1.13      |       | 0.90      |       |              |       |       | 1.17      |       | 0.98      |       | 0.79      |       |
| Fe <sub>2</sub>                | 0.68      |       | 0.94      |       | 2.51         | 2.38  | 0.002 | 0.68      |       | 0.84      |       | 1.14      |       |
| Mn                             | 0.04      |       | 0.04      |       | 0.052        | 0.005 |       | 0.04      |       | 0.04      |       | 0.03      |       |
| Mg                             | 2.61      |       | 2.52      |       | 0.266        | 2.31  |       | 2.61      |       | 2.69      |       | 2.55      |       |
| Ca                             | 1.60      | 0.351 | 1.66      | 0.344 | 0.329        |       | 0.373 | 1.59      | 0.301 | 1.67      | 0.336 | 1.79      | 0.308 |
| Na                             | 0.46      | 0.650 | 0.44      | 0.649 |              | 0.059 | 0.622 | 0.42      | 0.693 | 0.39      | 0.656 | 0.43      | 0.678 |
| K                              | 0.05      | 0.006 | 0.06      | 0.009 |              | 1.65  | 0.003 | 0.05      | 0.003 | 0.06      | 0.004 | 0.13      | 0.007 |
| Temperature °C                 | 713, HBPL |       | 685, HBPL |       | 638, GABI    |       |       | 676, HBPL |       | 689, HBPL |       | 723, HBPL |       |
| Pressure, kilobars             | 5.6, ALHB |       | 6.1, ALHB |       | 5.3, GASP-Si |       |       | 5.7, ALHB |       | 4.8, ALHB |       | 5.3, ALHB |       |

| Table 1 Compositions of Minerals used for Thermobarometry |       |           |       |           |       |           |       |              |       |       |           |       |              |      |      |
|-----------------------------------------------------------|-------|-----------|-------|-----------|-------|-----------|-------|--------------|-------|-------|-----------|-------|--------------|------|------|
| Map Number                                                |       | 33        |       | 34        |       | 35        |       | 36           |       |       | 37        |       | 38           |      |      |
| Field Number                                              |       | 176-215   |       | 176-124   |       | 164-196   |       | 179-NB55     |       |       | 176-220   |       | JT89-17      |      |      |
| Rock Unit                                                 |       | UP        |       | UP        |       | SP        |       | SE           |       |       | SP        |       | SE           |      |      |
| Reference                                                 |       | 1         |       | 1         |       | 1,2       |       | 1            |       |       | 1         |       | 2            |      |      |
| Mineral                                                   |       | HB        | PL    | HB        | PL    | HB        | PL    | GA           | BI    | PL    | HB        | PL    | GA           | BI   | PL   |
| Wt% Oxide                                                 | SiO2  | 45.4      | 61.1  | 45.8      | 60.2  | 42.6      | 57.4  | 36.8         | 35.6  | 60.4  | 47.1      | 59.9  |              |      |      |
|                                                           | TiO2  | 0.79      |       | 1.12      |       | 1.05      |       |              | 2.68  |       | 0.94      |       |              |      |      |
|                                                           | Al2O3 | 10.3      | 24.6  | 10.2      | 24.9  | 11.5      | 25.0  | 20.6         | 19.3  | 25.3  | 8.83      | 25.0  |              |      |      |
|                                                           | FeO   | 16.2      |       | 15.8      |       | 18.7      | 0.04  | 34.0         | 18.9  | 0.05  | 15.3      |       |              |      |      |
|                                                           | MnO   | 0.27      |       | 0.36      |       | 0.49      |       | 3.61         | 0.04  |       | 0.38      |       |              |      |      |
|                                                           | MgO   | 11.7      |       | 11.5      |       | 9.54      |       | 4.08         | 10.5  |       | 12.1      |       |              |      |      |
|                                                           | CaO   | 11.4      | 6.40  | 11.6      | 6.69  | 11.5      | 6.77  | 1.77         |       | 6.94  | 11.5      | 6.90  |              |      |      |
|                                                           | Na2O  | 1.45      | 7.96  | 1.40      | 7.62  | 1.55      | 7.74  |              | 0.22  | 8.02  | 1.07      | 7.67  |              |      |      |
|                                                           | K2O   | 0.57      | 0.16  | 0.70      | 0.13  | 0.86      | 0.18  |              | 8.19  | 0.07  | 0.60      | 0.16  |              |      |      |
|                                                           | Total | 98.1      | 100.2 | 98.5      | 99.5  | 97.8      | 97.1  | 100.9        | 95.4  | 100.7 | 97.9      | 99.6  |              |      |      |
|                                                           |       |           |       |           |       |           |       |              |       |       |           |       |              |      |      |
| Cations                                                   | Si    | 6.61      | 2.71  | 6.67      | 2.69  | 6.35      | 2.64  | 2.95         | 5.36  | 2.67  | 6.85      | 2.68  | 2.99         | 5.63 |      |
|                                                           | Ti    | 0.09      |       | 0.12      |       | 0.12      |       |              | 0.303 |       | 0.10      |       |              | 0.30 |      |
|                                                           | Al    | 1.77      | 1.29  | 1.75      | 1.31  | 2.02      | 1.36  | 1.95         | 3.43  | 1.32  | 1.51      | 1.32  | 2.00         | 3.49 |      |
|                                                           | Fe3   | 0.78      |       | 0.53      |       | 0.76      |       |              |       |       | 0.59      |       |              |      |      |
|                                                           | Fe2   | 1.19      |       | 1.39      |       | 1.57      | 0.002 | 2.28         | 2.37  | 0.002 | 1.27      |       | 2.10         | 2.40 |      |
|                                                           | Mn    | 0.03      |       | 0.04      |       | 0.06      |       | 0.245        | 0.005 |       | 0.05      |       | 0.23         | 0.01 |      |
|                                                           | Mg    | 2.54      |       | 2.49      |       | 2.12      |       | 0.488        | 2.35  |       | 2.63      |       | 0.54         | 2.53 |      |
|                                                           | Ca    | 1.78      | 0.304 | 1.81      | 0.320 | 1.84      | 0.334 | 0.152        |       | 0.329 | 1.79      | 0.331 | 0.15         |      | 0.33 |
|                                                           | Na    | 0.41      | 0.685 | 0.39      | 0.660 | 0.45      | 0.690 |              | 0.064 | 0.688 | 0.30      | 0.665 |              | 0.08 | 0.69 |
|                                                           | K     | 0.11      | 0.009 | 0.13      | 0.007 | 0.16      | 0.011 |              | 1.57  | 0.004 | 0.11      | 0.009 |              | 1.75 |      |
|                                                           |       |           |       |           |       |           |       |              |       |       |           |       |              |      |      |
| Temperature °C                                            |       | 702, HBPL |       | 692, HBPL |       | 742, HBPL |       | 650, GABI    |       |       | 663, HBPL |       | 689, GABI    |      |      |
| Pressure, kilobars                                        |       | 5.1, ALHB |       | 5.1, ALHB |       | 5.5, ALHB |       | 5.1, GASP-Si |       |       | 4.3, ALHB |       | 5.9, GASP-Si |      |      |

| Table 1 Compositions of Minerals used for Thermobarometry |       |           |       |              |       |       |           |       |           |       |           |       |           |       |      |
|-----------------------------------------------------------|-------|-----------|-------|--------------|-------|-------|-----------|-------|-----------|-------|-----------|-------|-----------|-------|------|
| Map Number                                                |       | 39        |       | 40           |       |       | 41        |       | 42        |       | 43        |       | 44        |       |      |
| Field Number                                              |       | JT89-16   |       | 179-NB205B   |       |       | 176-40    |       | 176-39    |       | 176-30    |       | 176-18    |       |      |
| Rock Unit                                                 |       | SP        |       | SE           |       |       | SP        |       | SP        |       | SP        |       | SP        |       |      |
| Reference                                                 |       | 1, 2      |       | 1            |       |       | 1         |       | 1         |       | 1         |       | 1         |       |      |
| Mineral                                                   |       | HB        | PL    | GA           | BI    | PL    | HB        | PL    | HB        | PL    | HB        | PL    | HB        | PL    |      |
| Wt% Oxide                                                 | SiO2  | 43.2      | 59.0  | 38.3         | 35.5  | 51.8  | 43.0      | 59.0  | 44.0      | 59.9  | 44.08     | 59.7  | 43.8      | 60.5  |      |
|                                                           | TiO2  | 1.20      |       |              | 3.03  |       | 0.83      |       | 0.72      |       | 0.75      |       | 0.84      |       |      |
|                                                           | Al2O3 | 13.0      | 25.3  | 21.0         | 17.9  | 28.5  | 11.1      | 24.8  | 10.4      | 24.7  | 10.2      | 24.3  | 10.7      | 24.5  |      |
|                                                           | FeO   | 18.0      |       | 30.6         | 15.2  | 0.01  | 18.3      | 0.03  | 17.5      | 0.04  | 17.3      | 0.13  | 17.3      | 0.14  |      |
|                                                           | MnO   | 0.43      |       | 0.84         | 0.01  |       | 0.53      |       | 0.41      |       | 0.49      |       | 0.44      |       |      |
|                                                           | MgO   | 8.69      |       | 6.27         | 11.8  |       | 10.1      |       | 11.0      |       | 11.4      |       | 11.0      |       |      |
|                                                           | CaO   | 11.4      | 7.03  | 1.79         |       | 12.2  | 11.4      | 6.23  | 11.6      | 6.20  | 11.6      | 6.06  | 11.5      | 5.95  |      |
|                                                           | Na2O  | 1.41      | 7.59  |              | 0.28  | 4.64  | 1.53      | 7.98  | 1.41      | 7.96  | 1.46      | 8.11  | 1.59      | 8.03  |      |
|                                                           | K2O   | 0.66      | 0.13  |              | 9.47  | 0.06  | 0.97      | 0.25  | 1.12      | 0.28  | 1.02      | 0.32  | 1.08      | 0.24  |      |
|                                                           | Total | 98.0      | 99.0  | 98.7         | 93.2  | 97.2  | 97.8      | 98.3  | 98.2      | 98.0  | 98.3      | 98.6  | 98.3      | 99.3  |      |
| Cations                                                   |       | Si        | 6.40  | 2.66         | 3.04  | 5.43  | 2.42      | 6.39  | 2.67      | 6.49  | 2.68      | 6.47  | 2.70      | 6.45  | 2.71 |
|                                                           | Ti    | 0.13      |       |              |       | 0.349 |           | 0.09  |           | 0.08  |           | 0.08  |           | 0.09  |      |
|                                                           | Al    | 2.27      | 1.34  | 1.96         | 3.23  | 1.57  | 1.94      | 1.33  | 1.81      | 1.32  | 1.76      | 1.29  | 1.86      | 1.29  |      |
|                                                           | Fe3   | 0.52      |       |              |       |       | 0.84      |       | 0.78      |       | 0.87      |       | 0.77      |       |      |
|                                                           | Fe2   | 1.71      |       | 2.03         | 1.95  |       | 1.43      | 0.001 | 1.38      | 0.002 | 1.26      | 0.005 | 1.36      | 0.005 |      |
|                                                           | Mn    | 0.05      |       | 0.056        | 0.001 |       | 0.07      |       | 0.05      |       | 0.06      |       | 0.05      |       |      |
|                                                           | Mg    | 1.92      |       | 0.742        | 2.69  |       | 2.24      |       | 2.42      |       | 2.49      |       | 2.41      |       |      |
|                                                           | Ca    | 1.81      | 0.339 | 0.152        |       | 0.611 | 1.81      | 0.303 | 1.83      | 0.302 | 1.82      | 0.293 | 1.81      | 0.285 |      |
|                                                           | Na    | 0.40      | 0.663 |              | 0.083 | 0.419 | 0.44      | 0.701 | 0.40      | 0.702 | 0.42      | 0.711 | 0.45      | 0.697 |      |
|                                                           | K     | 0.12      | 0.007 |              | 1.85  | 0.004 | 0.18      | 0.014 | 0.21      | 0.016 | 0.19      | 0.018 | 0.20      | 0.014 |      |
| Temperature °C                                            |       | 684, HBPL |       | 730, GABI    |       |       | 738, HBPL |       | 729, HBPL |       | 750, HBPL |       | 735, HBPL |       |      |
| Pressure, kilobars                                        |       | 7.7, ALHB |       | 6.1, GASP-Si |       |       | 5.2, ALHB |       | 4.8, ALHB |       | 4.2, ALHB |       | 4.9, ALHB |       |      |

| Table 1 Compositions of Minerals used for Thermobarometry |           |       |           |       |           |       |           |       |              |      |      |           |       |       |       |
|-----------------------------------------------------------|-----------|-------|-----------|-------|-----------|-------|-----------|-------|--------------|------|------|-----------|-------|-------|-------|
| Map Number                                                | 45        |       | 46        |       | 47        |       | 48        |       | 49           |      |      | 50        |       |       |       |
| Field Number                                              | 176-15    |       | 164-350   |       | 164-347   |       | 164-280   |       | 164-203C     |      |      | 164-283   |       |       |       |
| Rock Unit                                                 | SP        |       | SP        |       | SP        |       | SP        |       | SE           |      |      | SE        |       |       |       |
| Reference                                                 | 1         |       | 1         |       | 1         |       | 1,2       |       | 2            |      |      | 1         |       |       |       |
| Mineral                                                   | HB        | PL    | HB        | PL    | HB        | PL    | HB        | PL    | GA           | BI   | PL   | GA        | BI    | MU    | PL    |
| Wt% Oxide SiO <sub>2</sub>                                | 42.3      | 60.9  | 44.2      | 61.1  | 43.6      | 58.4  | 42.4      | 59.9  |              |      |      | 36.7      | 35.3  | 47.5  | 59.9  |
| TiO <sub>2</sub>                                          | 0.94      |       | 1.11      |       | 0.89      |       | 1.22      |       |              |      |      | 0.06      | 1.68  | 0.16  |       |
| Al <sub>2</sub> O <sub>3</sub>                            | 11.3      | 23.6  | 10.5      | 24.0  | 10.9      | 24.6  | 11.2      | 24.1  |              |      |      | 20.5      | 18.0  | 32.4  | 26.3  |
| FeO                                                       | 19.7      | 0.07  | 19.2      |       | 17.1      | 0.04  | 19.6      | 0.01  |              |      |      | 31.4      | 21.6  | 2.28  | 0.11  |
| MnO                                                       | 0.06      |       | 0.58      |       | 0.42      |       | 0.40      |       |              |      |      | 4.23      | 0.07  |       |       |
| MgO                                                       | 8.50      |       | 9.22      |       | 11.1      |       | 8.87      |       |              |      |      | 1.70      | 8.72  | 1.81  |       |
| CaO                                                       | 11.4      | 5.02  | 11.2      | 5.54  | 11.5      | 6.05  | 11.7      | 5.23  |              |      |      | 5.24      |       |       | 7.82  |
| Na <sub>2</sub> O                                         | 1.42      | 8.67  | 1.58      | 8.27  | 1.58      | 8.03  | 1.44      | 8.65  |              |      |      |           | 0.01  | 0.32  | 7.51  |
| K <sub>2</sub> O                                          | 1.46      | 0.17  | 0.79      | 0.29  | 1.08      | 0.24  | 1.37      | 0.13  |              |      |      |           | 8.94  | 10.4  | 0.05  |
| Total                                                     | 97.1      | 98.4  | 98.4      | 99.2  | 98.2      | 97.3  | 98.2      | 97.9  |              |      |      | 99.8      | 94.3  | 94.9  | 101.6 |
| Cations Si                                                | 6.43      | 2.75  | 6.55      | 2.74  | 6.42      | 2.68  | 6.38      | 2.72  | 3.00         | 5.90 |      | 2.98      | 5.48  | 6.37  | 2.63  |
| Ti                                                        | 0.11      |       | 0.12      |       | 0.10      |       | 0.14      |       |              | 0.22 |      |           | 0.196 | 0.02  |       |
| Al                                                        | 2.02      | 1.25  | 1.83      | 1.27  | 1.89      | 1.33  | 1.98      | 1.29  | 2.00         | 3.75 |      | 1.97      | 3.29  | 5.12  | 1.36  |
| Fe <sub>3</sub>                                           | 0.48      |       | 0.65      |       | 0.79      |       | 0.54      |       |              |      |      |           |       |       |       |
| Fe <sub>2</sub>                                           | 2.02      | 0.003 | 1.73      |       | 1.31      | 0.002 | 1.93      |       | 2.19         | 2.34 |      | 2.13      | 2.80  | 0.256 | 0.004 |
| Mn                                                        | 0.01      |       | 0.07      |       | 0.05      |       | 0.05      |       | 0.15         |      |      | 0.291     | 0.009 |       |       |
| Mg                                                        | 1.92      |       | 2.04      |       | 2.43      |       | 1.99      |       | 0.52         |      |      | 0.206     | 2.02  | 0.362 |       |
| Ca                                                        | 1.86      | 0.243 | 1.78      | 0.266 | 1.81      | 0.297 | 1.88      | 0.254 | 0.32         |      | 0.31 | 0.456     |       |       | 0.368 |
| Na                                                        | 0.42      | 0.758 | 0.45      | 0.718 | 0.45      | 0.713 | 0.42      | 0.761 |              | 0.08 | 0.71 |           | 0.003 | 0.083 | 0.640 |
| K                                                         | 0.28      | 0.010 | 0.15      | 0.017 | 0.20      | 0.014 | 0.26      | 0.008 |              | 1.90 |      |           | 1.77  | 1.78  | 0.003 |
| Temperature °C                                            | 682, HBPL |       | 696, HBPL |       | 736, HBPL |       | 715, HBPL |       | 620, GABI    |      |      | 494, GABI |       |       |       |
| Pressure, kilobars                                        | 6.5, ALHB |       | 5.5, ALHB |       | 5.1, ALHB |       | 5.8, ALHB |       | 5.6, GASP-Ky |      |      | 5.4, GAMI |       |       |       |



## Notes for Table 1.

### References:

1 = This study, 2 = Brown and Walker (1993), 3 = Brown and Burmester (1991), 4 = Bennett (1989), 5 = Reamsbottom (1974)

### Rock unit abbreviations:

SE = Settler Schist, SL = Slollicum unit, SP= Scuzzy pluton, UP = Urquhart pluton.

### Mineral Abreviations:

BI = biotite, GA = garnet HB = hornblende, MU = muscovite, PL = plagioclase.

### Cations:

Based on charge balance (cation charge = garnet 24, mica 44, plagioclase 16, hornblende 46). Fe partitioned into ferrous and ferric states for amphibole only, based on charge balance and  $(\text{Fe}+\text{Mg}+\text{Mn}+\text{Ti}+\text{Al}+\text{Si}) = 13$ .

### Temperature calculation:

HBPL = hornblende-plagioclase; calibration of Holland and Blundy (1994). GABI = garnet-biotite; calibration of Berman (1991); garnet solution model of Berman (1990); biotite solution model of McMullen and others (1991).

### Pressure calculation:

ALHB = Al-in-hornblende; calibration of Anderson and Smith (1995). GASP-Si = garnet-quartz-plagioclase-sillimanite; GASP-Ky = garnet-quartz-plagioclase-kyanite; GAMI = garnet-quartz-biotite-muscovite-plagioclase; calibration of Berman (1991); garnet and biotite solution models as above; plagioclase solution model of Fuhrman and Lindsley (1988).

DR TABLE 2. U-Pb isotopic data and apparent ages.

| Fraction-Size <sup>a</sup><br>( $\mu$ m)                                             | Wt<br>(mg) | Concentration <sup>b</sup> |     | Isotopic composition <sup>c</sup>         |                                           |                                           | Apparent Ages (Ma) <sup>d</sup>            |                                            |                                               | Th-corrected Ages (Ma) <sup>e</sup>        |                                               |              |
|--------------------------------------------------------------------------------------|------------|----------------------------|-----|-------------------------------------------|-------------------------------------------|-------------------------------------------|--------------------------------------------|--------------------------------------------|-----------------------------------------------|--------------------------------------------|-----------------------------------------------|--------------|
|                                                                                      |            | U                          | Pb* | $\frac{^{206}\text{Pb}}{^{204}\text{Pb}}$ | $\frac{^{206}\text{Pb}}{^{207}\text{Pb}}$ | $\frac{^{206}\text{Pb}}{^{208}\text{Pb}}$ | $\frac{^{206}\text{Pb}^*}{^{238}\text{U}}$ | $\frac{^{207}\text{Pb}^*}{^{235}\text{U}}$ | $\frac{^{207}\text{Pb}^*}{^{206}\text{Pb}^*}$ | $\frac{^{206}\text{Pb}^*}{^{238}\text{U}}$ | $\frac{^{207}\text{Pb}^*}{^{206}\text{Pb}^*}$ |              |
| <b>Sample 1. Fir Creek Pluton</b> (# 179-NB16; lat 50°03.00'N, long 121°47.64'W)     |            |                            |     |                                           |                                           |                                           |                                            |                                            |                                               |                                            |                                               |              |
| a                                                                                    | 45-63      | 0.04                       | 221 | 4.6                                       | 1794                                      | 17.360                                    | 7.766                                      | 154.8                                      | 155.7 $\pm$ 0.4                               | 170                                        | 154.9 $\pm$ 0.3                               | 169 $\pm$ 3  |
| b                                                                                    | 63-80      | 0.7                        | 239 | 5.8                                       | 10,363                                    | 19.720                                    | 9.596                                      | 155.6                                      | 156.0 $\pm$ 0.3                               | 162                                        | 155.6 $\pm$ 0.3                               | 161 $\pm$ 1  |
| c                                                                                    | 125-145    | 1.2                        | 227 | 5.5                                       | 7094                                      | 19.494                                    | 9.840                                      | 155.5                                      | 155.7 $\pm$ 0.3                               | 159                                        | 155.6 $\pm$ 0.3                               | 157 $\pm$ 1  |
| d                                                                                    | 125-145A   | 0.7                        | 147 | 3.6                                       | 5923                                      | 19.343                                    | 8.850                                      | 157.2                                      | 157.2 $\pm$ 0.3                               | 158                                        | 157.2 $\pm$ 0.3                               | 157 $\pm$ 1  |
| e                                                                                    | 145-350A   | 0.4                        | 193 | 4.7                                       | 6997                                      | 19.486                                    | 8.864                                      | 157.3                                      | 157.4 $\pm$ 0.3                               | 159                                        | 157.4 $\pm$ 0.3                               | 157 $\pm$ 1  |
| <b>Sample 2. Settler Creek Pluton</b> (# 179-MD25; lat 49°32.23'N, long 121°36.32'W) |            |                            |     |                                           |                                           |                                           |                                            |                                            |                                               |                                            |                                               |              |
| a                                                                                    | 45-63      | 0.5                        | 489 | 7.1                                       | 14,537                                    | 20.409                                    | 13.423                                     | 96.6                                       | 96.7 $\pm$ 0.2                                | 99                                         | 96.7 $\pm$ 0.2                                | 97 $\pm$ 1   |
| b                                                                                    | 63-80A     | 0.9                        | 278 | 4.1                                       | 23,038                                    | 20.515                                    | 12.392                                     | 97.1                                       | 97.4 $\pm$ 0.2                                | 105                                        | 97.2 $\pm$ 0.2                                | 103 $\pm$ 1  |
| c                                                                                    | 80-100A    | 0.9                        | 227 | 3.3                                       | 7041                                      | 19.961                                    | 11.781                                     | 97.0                                       | 97.1 $\pm$ 0.2                                | 100                                        | 97.0 $\pm$ 0.2                                | 98 $\pm$ 2   |
| d                                                                                    | 80-100A    | 0.3                        | 350 | 5.2                                       | 14,588                                    | 20.350                                    | 11.165                                     | 97.5                                       | 97.8 $\pm$ 0.2                                | 106                                        | 97.5 $\pm$ 0.2                                | 104 $\pm$ 2  |
| <b>Sample 3. Hut Creek Pluton</b> (# 179-CB22; lat 49°33.35'N, long 121°42.07'W)     |            |                            |     |                                           |                                           |                                           |                                            |                                            |                                               |                                            |                                               |              |
| a                                                                                    | 45-63      | 0.6                        | 275 | 4.0                                       | 6767                                      | 19.953                                    | 10.571                                     | 94.2                                       | 94.3 $\pm$ 0.2                                | 97                                         | 94.3 $\pm$ 0.2                                | 95 $\pm$ 2   |
| b                                                                                    | 63-80      | 0.4                        | 199 | 2.8                                       | 3503                                      | 19.165                                    | 11.330                                     | 94.4                                       | 94.6 $\pm$ 0.2                                | 99                                         | 94.5 $\pm$ 0.2                                | 96 $\pm$ 2   |
| c                                                                                    | 80-100A    | 0.5                        | 171 | 2.4                                       | 9346                                      | 20.188                                    | 13.347                                     | 94.5                                       | 94.6 $\pm$ 0.2                                | 98                                         | 94.6 $\pm$ 0.2                                | 96 $\pm$ 3   |
| d                                                                                    | 100-350A   | 0.4                        | 185 | 2.7                                       | 4245                                      | 19.451                                    | 9.659                                      | 94.7                                       | 94.7 $\pm$ 0.2                                | 97                                         | 94.8 $\pm$ 0.2                                | 95 $\pm$ 2   |
| <b>Sample 4. Hornet Creek Pluton</b> (# 179-KS1; lat 49°38.58'N, long 121°47.00'W)   |            |                            |     |                                           |                                           |                                           |                                            |                                            |                                               |                                            |                                               |              |
| a                                                                                    | 63-80      | 0.8                        | 179 | 2.6                                       | 2292                                      | 18.232                                    | 12.879                                     | 98.3                                       | 99.1 $\pm$ 0.2                                | 120                                        | 98.3 $\pm$ 0.2                                | 118 $\pm$ 3  |
| b                                                                                    | 80-100     | 0.7                        | 191 | 2.8                                       | 2332                                      | 18.185                                    | 13.046                                     | 99.0                                       | 100.3 $\pm$ 0.3                               | 133                                        | 99.1 $\pm$ 0.2                                | 131 $\pm$ 4  |
| c                                                                                    | 100-350    | 0.2                        | 164 | 2.5                                       | 1136                                      | 16.045                                    | 8.248                                      | 98.1                                       | 100.8 $\pm$ 0.3                               | 167                                        | 98.1 $\pm$ 0.2                                | 165 $\pm$ 5  |
| <b>Partial Dissolution Results:</b>                                                  |            |                            |     |                                           |                                           |                                           |                                            |                                            |                                               |                                            |                                               |              |
|                                                                                      |            | % U                        |     |                                           |                                           |                                           |                                            |                                            |                                               |                                            |                                               |              |
| L1                                                                                   |            | 2.4%                       | 3   | 0.05                                      | 185                                       | 7.595                                     | 3.959                                      | 98.7                                       | 108.2 $\pm$ 1.0                               | 322                                        | 98.8 $\pm$ 0.3                                | 321 $\pm$ 20 |
| L2                                                                                   |            | 51.0%                      | 70  | 1.0                                       | 2955                                      | 18.670                                    | 15.207                                     | 98.2                                       | 99.4 $\pm$ 0.3                                | 128                                        | 98.3 $\pm$ 0.3                                | 127 $\pm$ 2  |
| L3                                                                                   |            | 32.4%                      | 44  | 0.7                                       | 9471                                      | 20.062                                    | 12.659                                     | 97.8                                       | 98.5 $\pm$ 0.3                                | 114                                        | 97.9 $\pm$ 0.3                                | 113 $\pm$ 2  |
| R                                                                                    |            | 14.1%                      | 19  | 0.3                                       | 3573                                      | 19.158                                    | 11.494                                     | 98.2                                       | 98.4 $\pm$ 0.3                                | 104                                        | 98.2 $\pm$ 0.5                                | 103 $\pm$ 3  |
| T                                                                                    | 100-350    | 0.9                        | 151 | 2.2                                       |                                           |                                           |                                            | 98.1                                       | 99.2 $\pm$ 0.3                                | 125                                        | 98.2 $\pm$ 0.3                                | 124 $\pm$ 2  |
| <b>Sample 5. Breakenridge Pluton</b> (# 180-GN; lat 49°37.60'N, long 121°50.36'W)    |            |                            |     |                                           |                                           |                                           |                                            |                                            |                                               |                                            |                                               |              |
| a                                                                                    | 63-80      | 0.6                        | 148 | 2.4                                       | 1753                                      | 17.679                                    | 7.623                                      | 103.7                                      | 103.9 $\pm$ 0.3                               | 108                                        | 103.8 $\pm$ 0.2                               | 106 $\pm$ 4  |
| b                                                                                    | 63-80      | 0.6                        | 136 | 2.2                                       | 1461                                      | 17.158                                    | 7.405                                      | 103.7                                      | 103.9 $\pm$ 0.3                               | 110                                        | 103.8 $\pm$ 0.2                               | 108 $\pm$ 4  |
| c                                                                                    | 80-100     | 0.7                        | 130 | 2.1                                       | 1659                                      | 17.407                                    | 7.770                                      | 104.6                                      | 105.6 $\pm$ 0.3                               | 128                                        | 104.7 $\pm$ 0.2                               | 126 $\pm$ 3  |
| d                                                                                    | 100-350    | 0.2                        | 101 | 1.7                                       | 990                                       | 15.582                                    | 6.900                                      | 106.9                                      | 109.4 $\pm$ 0.3                               | 165                                        | 106.9 $\pm$ 0.2                               | 164 $\pm$ 5  |
| <b>Sample 6. Urquhart Pluton (Rim)</b> (#179-NB54; lat 49°43.42'N, long 121°42.07'W) |            |                            |     |                                           |                                           |                                           |                                            |                                            |                                               |                                            |                                               |              |
| a                                                                                    | 45-63      | 0.6                        | 449 | 5.9                                       | 4493                                      | 19.455                                    | 16.152                                     | 88.4                                       | 89.0 $\pm$ 0.2                                | 106                                        | 88.5 $\pm$ 0.2                                | 103 $\pm$ 2  |
| b                                                                                    | 100-125    | 0.3                        | 332 | 4.4                                       | 3735                                      | 19.197                                    | 14.532                                     | 89.5                                       | 90.1 $\pm$ 0.2                                | 107                                        | 89.5 $\pm$ 0.2                                | 105 $\pm$ 2  |
| c                                                                                    | 145-350A   | 0.5                        | 419 | 5.5                                       | 5024                                      | 19.630                                    | 14.654                                     | 88.0                                       | 88.4 $\pm$ 0.2                                | 100                                        | 88.1 $\pm$ 0.2                                | 98 $\pm$ 2   |

Partial Dissolution Results:

|    | % U     |     |     |        |        |        |      |            |     |            |         |  |
|----|---------|-----|-----|--------|--------|--------|------|------------|-----|------------|---------|--|
| L1 | 26.3%   | 199 | 2.6 | 1897   | 17.946 | 14.680 | 88.3 | 88.6 ± 0.3 | 97  | 88.4 ± 0.3 | 96 ± 3  |  |
| L2 | 22.1%   | 167 | 2.1 | 2300   | 18.312 | 13.917 | 89.2 | 90.0 ± 0.3 | 110 | 89.3 ± 0.3 | 108 ± 3 |  |
| L3 | 33.1%   | 250 | 3.4 | 16,211 | 20.413 | 15.467 | 91.7 | 92.1 ± 0.3 | 103 | 91.7 ± 0.3 | 102 ± 2 |  |
| R  | 18.5%   | 140 | 2.0 | 22,184 | 20.590 | 14.232 | 92.3 | 92.3 ± 0.3 | 95  | 92.3 ± 0.3 | 93 ± 2  |  |
| T  | 145-350 | 2.2 | 344 | 4.6    |        |        | 90.4 | 90.8 ± 0.3 | 102 | 90.4 ± 0.3 | 100 ± 2 |  |

**Sample 7. Urquhart Pluton (Core) (#179-NB56; lat 49°39.81'N, long 121°42.07'W)**

|   |          |     |    |     |      |        |       |      |            |     |            |          |
|---|----------|-----|----|-----|------|--------|-------|------|------------|-----|------------|----------|
| a | 63-80    | 0.2 | 92 | 1.3 | 1011 | 15.904 | 8.028 | 90.8 | 91.8 ± 0.4 | 118 | 90.9 ± 0.2 | 116 ± 8  |
| b | 125-350  | 0.3 | 75 | 1.0 | 755  | 14.558 | 7.120 | 90.9 | 93.5 ± 0.5 | 160 | 90.9 ± 0.2 | 158 ± 11 |
| c | 125-350A | 0.4 | 69 | 1.0 | 2082 | 18.113 | 9.468 | 91.0 | 91.6 ± 0.3 | 108 | 91.1 ± 0.2 | 106 ± 7  |

Partial Dissolution Results:

|    | % U     |     |       |        |        |        |      |            |     |            |          |  |
|----|---------|-----|-------|--------|--------|--------|------|------------|-----|------------|----------|--|
| L1 | 0.1%    | 0.3 | 0.002 | 28     | 1.734  | 0.655  |      |            |     |            |          |  |
| L2 | 2.0%    | 5   | 0.07  | 217    | 8.244  | 3.483  | 84.4 | 95.2 ± 0.8 | 376 | 84.4 ± 0.3 | 374 ± 17 |  |
| L3 | 15.6%   | 42  | 0.6   | 1019   | 15.786 | 8.817  | 91.1 | 93.1 ± 0.4 | 144 | 91.2 ± 0.3 | 143 ± 6  |  |
| L4 | 54.8%   | 146 | 2.0   | 11,010 | 20.259 | 11.374 | 91.2 | 91.6 ± 0.3 | 101 | 91.3 ± 0.3 | 99 ± 2   |  |
| R  | 27.6%   | 74  | 1.0   | 9850   | 20.251 | 10.612 | 91.1 | 91.2 ± 0.3 | 94  | 91.2 ± 0.3 | 93 ± 2   |  |
| T  | 125-350 | 3.8 | 70    | 1.0    |        |        | 91.0 | 91.7 ± 0.3 | 111 | 91.0 ± 0.3 | 110 ± 2  |  |

**Sample 8. Scuzzy Pluton (SW Rim) (# 179NB-18; lat 49°49.05'N, long 121°53.57'W)**

|   |         |     |     |     |        |        |        |      |            |     |            |         |
|---|---------|-----|-----|-----|--------|--------|--------|------|------------|-----|------------|---------|
| a | 63-80   | 0.8 | 295 | 3.8 | 8774   | 20.107 | 16.469 | 86.0 | 86.5 ± 0.2 | 102 | 86.0 ± 0.2 | 100 ± 1 |
| b | 80-100  | 0.3 | 258 | 3.4 | 5603   | 19.745 | 14.548 | 87.8 | 88.3 ± 0.2 | 100 | 87.9 ± 0.2 | 98 ± 3  |
| c | 100-350 | 0.8 | 339 | 4.3 | 13,008 | 20.337 | 18.432 | 86.3 | 86.8 ± 0.2 | 101 | 86.3 ± 0.2 | 99 ± 1  |

Partial Dissolution Results:

|    | % U     |     |     |        |        |        |      |            |     |            |         |  |
|----|---------|-----|-----|--------|--------|--------|------|------------|-----|------------|---------|--|
| L1 | 9.2%    | 53  | 0.6 | 1165   | 16.228 | 19.357 | 79.8 | 82.0 ± 0.3 | 148 | 79.8 ± 0.2 | 147 ± 6 |  |
| L2 | 87.2%   | 502 | 6.6 | 20,665 | 20.581 | 18.880 | 89.7 | 89.9 ± 0.3 | 93  | 89.8 ± 0.3 | 92 ± 2  |  |
| R  | 3.6%    | 21  | 0.3 | 3190   | 18.947 | 14.759 | 97.9 | 98.3 ± 0.3 | 109 | 98.0 ± 0.3 | 107 ± 4 |  |
| T  | 100-350 | 2.7 | 213 | 2.8    |        |        | 89.1 | 89.5 ± 0.3 | 99  | 89.2 ± 0.3 | 97 ± 2  |  |

**Sample 9. Scuzzy Pluton (NE Rim) (# 175-409; lat 50°03.00'N, long 121°47.64'W)**

|   |         |     |     |     |        |        |        |      |            |     |            |        |
|---|---------|-----|-----|-----|--------|--------|--------|------|------------|-----|------------|--------|
| a | 63-80   | 0.8 | 334 | 4.3 | 12,238 | 20.322 | 13.607 | 86.3 | 86.8 ± 0.2 | 100 | 86.4 ± 0.2 | 97 ± 1 |
| b | 80-100  | 0.8 | 377 | 4.9 | 12,765 | 20.336 | 13.638 | 86.7 | 87.2 ± 0.2 | 100 | 86.8 ± 0.2 | 98 ± 2 |
| c | 100-350 | 0.3 | 428 | 5.6 | 6535   | 19.911 | 12.470 | 86.9 | 87.3 ± 0.2 | 98  | 87.0 ± 0.2 | 96 ± 2 |

Partial Dissolution Results:

|    | % U     |     |     |        |        |        |      |            |     |            |         |  |
|----|---------|-----|-----|--------|--------|--------|------|------------|-----|------------|---------|--|
| L1 | 22.8%   | 83  | 1.0 | 3059   | 18.650 | 14.832 | 84.8 | 86.7 ± 0.3 | 139 | 84.9 ± 0.3 | 137 ± 5 |  |
| L2 | 75.4%   | 276 | 3.6 | 20,493 | 20.577 | 15.018 | 87.4 | 87.6 ± 0.3 | 93  | 87.4 ± 0.3 | 92 ± 2  |  |
| R  | 1.8%    | 7   | 0.1 | 1056   | 16.099 | 9.111  | 97.2 | 97.8 ± 0.4 | 112 | 97.2 ± 0.3 | 111 ± 5 |  |
| T  | 100-350 | 1.5 | 366 | 4.8    |        |        | 87.0 | 87.6 ± 0.3 | 104 | 87.0 ± 0.3 | 103 ± 2 |  |

**Sample 10. Scuzzy Pluton (Core) (#179-NB53; lat 49°51.53'N, long 121°44.29'W)**

|   |         |     |     |     |        |        |        |      |            |     |            |         |
|---|---------|-----|-----|-----|--------|--------|--------|------|------------|-----|------------|---------|
| a | 63-80   | 0.7 | 348 | 4.5 | 21,495 | 19.967 | 17.907 | 87.8 | 90.6 ± 0.2 | 167 | 87.8 ± 0.2 | 165 ± 2 |
| b | 80-100  | 0.7 | 411 | 5.2 | 15,353 | 19.819 | 19.387 | 85.8 | 88.8 ± 0.2 | 172 | 85.9 ± 0.2 | 169 ± 3 |
| c | 100-350 | 0.4 | 334 | 4.4 | 8604   | 18.823 | 18.713 | 89.3 | 95.7 ± 0.2 | 260 | 89.4 ± 0.2 | 258 ± 2 |

# Partial Dissolution Results:

|     | % U     |     |      |        |        |        |       |             |     |             |         |  |
|-----|---------|-----|------|--------|--------|--------|-------|-------------|-----|-------------|---------|--|
| La1 | 14.1%   | 69  | 0.8  | 2735   | 18.493 | 15.874 | 83.7  | 85.4 ± 0.4  | 134 | 83.8 ± 0.3  | 132 ± 7 |  |
| La2 | 84.1%   | 409 | 5.2  | 26,977 | 20.246 | 21.105 | 86.8  | 88.7 ± 0.3  | 141 | 86.9 ± 0.3  | 139 ± 1 |  |
| Ra  | 1.7%    | 8   | 0.2  | 2053   | 17.310 | 14.761 | 175.8 | 178.9 ± 0.6 | 225 | 175.5 ± 0.5 | 225 ± 4 |  |
| Ta  | 100-350 | 1.0 | 324  | 4.2    |        |        | 87.9  | 89.9 ± 0.3  | 143 | 88.0 ± 0.3  | 141 ± 2 |  |
| Lb1 | 6.1%    | 12  | 0.15 | 2629   | 18.725 | 18.470 | 87.7  | 87.8 ± 0.3  | 91  | 87.8 ± 0.3  | 90 ± 3  |  |
| Lb2 | 68.5%   | 131 | 1.62 | 20,561 | 20.439 | 20.599 | 84.2  | 85.1 ± 0.3  | 110 | 84.3 ± 0.3  | 108 ± 2 |  |
| Lb3 | 24.0%   | 46  | 0.58 | 9938   | 19.695 | 19.107 | 86.0  | 88.7 ± 0.3  | 162 | 86.0 ± 0.3  | 161 ± 2 |  |
| Rb  | 1.3%    | 3   | 0.04 | 451    | 12.086 | 7.551  | 100.5 | 105.0 ± 0.4 | 208 | 100.5 ± 0.3 | 207 ± 6 |  |
| Tb  | 80-350  | 0.6 | 347  | 4.3    |        |        | 85.1  | 86.4 ± 0.3  | 123 | 85.1 ± 0.3  | 121 ± 2 |  |

## **Sample 11. Scuzzy Pegmatite (# 179-NB52; lat 49°43.05'N, long 121°50.90'W)**

|   |        |     |     |     |      |        |        |      |            |     |            |         |
|---|--------|-----|-----|-----|------|--------|--------|------|------------|-----|------------|---------|
| a | 45-100 | 0.1 | 77  | 1.0 | 1890 | 17.981 | 23.515 | 90.6 | 90.7 ± 0.3 | 93  | 90.7 ± 0.2 | 91 ± 5  |
| b | 80-100 | 0.3 | 95  | 1.3 | 2654 | 18.381 | 23.029 | 93.1 | 94.9 ± 0.2 | 142 | 93.2 ± 0.2 | 140 ± 2 |
| c | 70-150 | 0.1 | 99  | 1.4 | 859  | 15.105 | 9.533  | 97.0 | 99.2 ± 0.3 | 153 | 97.0 ± 0.2 | 151 ± 6 |
| d | 80-350 | 0.2 | 104 | 1.3 | 1607 | 17.448 | 11.495 | 85.5 | 86.3 ± 0.2 | 108 | 85.6 ± 0.2 | 106 ± 2 |

<sup>a</sup> a, b, etc. designate conventional fractions; A designates conventional fractions abraded to 30 to 60% of original diameter; L1, L2, etc. designate leachate steps; R designates digestion of final residue; T designates mathematically recombined steps and residue. Dissolution schedule for 3-step experiments: 1 = 24 hours at 150°C; 2 = 24 hours at 210°C. For 4-step experiments: 1 = 24 hours at 80°C; 2 = 24 hours at 150°C; 3 = 24 hours at 200°C. For 5-step experiments: 1 = 24 hours at 80°C; 2 = 24 hours at 150°C; 3 = 24 hours at 200°C; 4 = 6 hours at 245°C. All conventional fractions and residues were dissolved in 60 hours at 245°C. All zircon fractions are non-magnetic on Frantz magnetic separator at 1.8 amps, 15° forward slope, and side slope of 4°: sample3; 3°: samples 8, 11; 2°: all others.

<sup>b</sup> Pb\* is radiogenic Pb and U expressed as ppm for conventional analyses and mathematically recombined partial dissolution totals. For partial dissolution steps, Pb and U expressed as nanograms and % of total U.

<sup>c</sup> Reported ratios corrected for fractionation ( $0.125 \pm 0.038\%/AMU$ ) and spike Pb. Ratios used in age calculation were adjusted for 10 to 20 pg of blank Pb with isotopic composition of  $^{206}Pb/^{204}Pb = 18.6$ ,  $^{207}Pb/^{204}Pb = 15.5$ , and  $^{208}Pb/^{204}Pb = 38.4$ , 2 pg of blank U,  $0.25 \pm 0.049\%/AMU$  fractionation for  $UO_2$ , and initial common Pb with isotopic composition approximated from Stacey and Kramers (1975) and assigned uncertainty of 0.1 to initial  $^{207}Pb/^{204}Pb$ .

<sup>d</sup> Uncertainties reported as 2 sigma. Decay constants:  $^{238}U = 1.5513 \text{ E-10}$ ,  $^{235}U = 9.8485 \text{ E-10}$ ;  $^{238}U/^{235}U = 137.88$ .

<sup>e</sup> See procedure description for discussion of applied Th corrections.

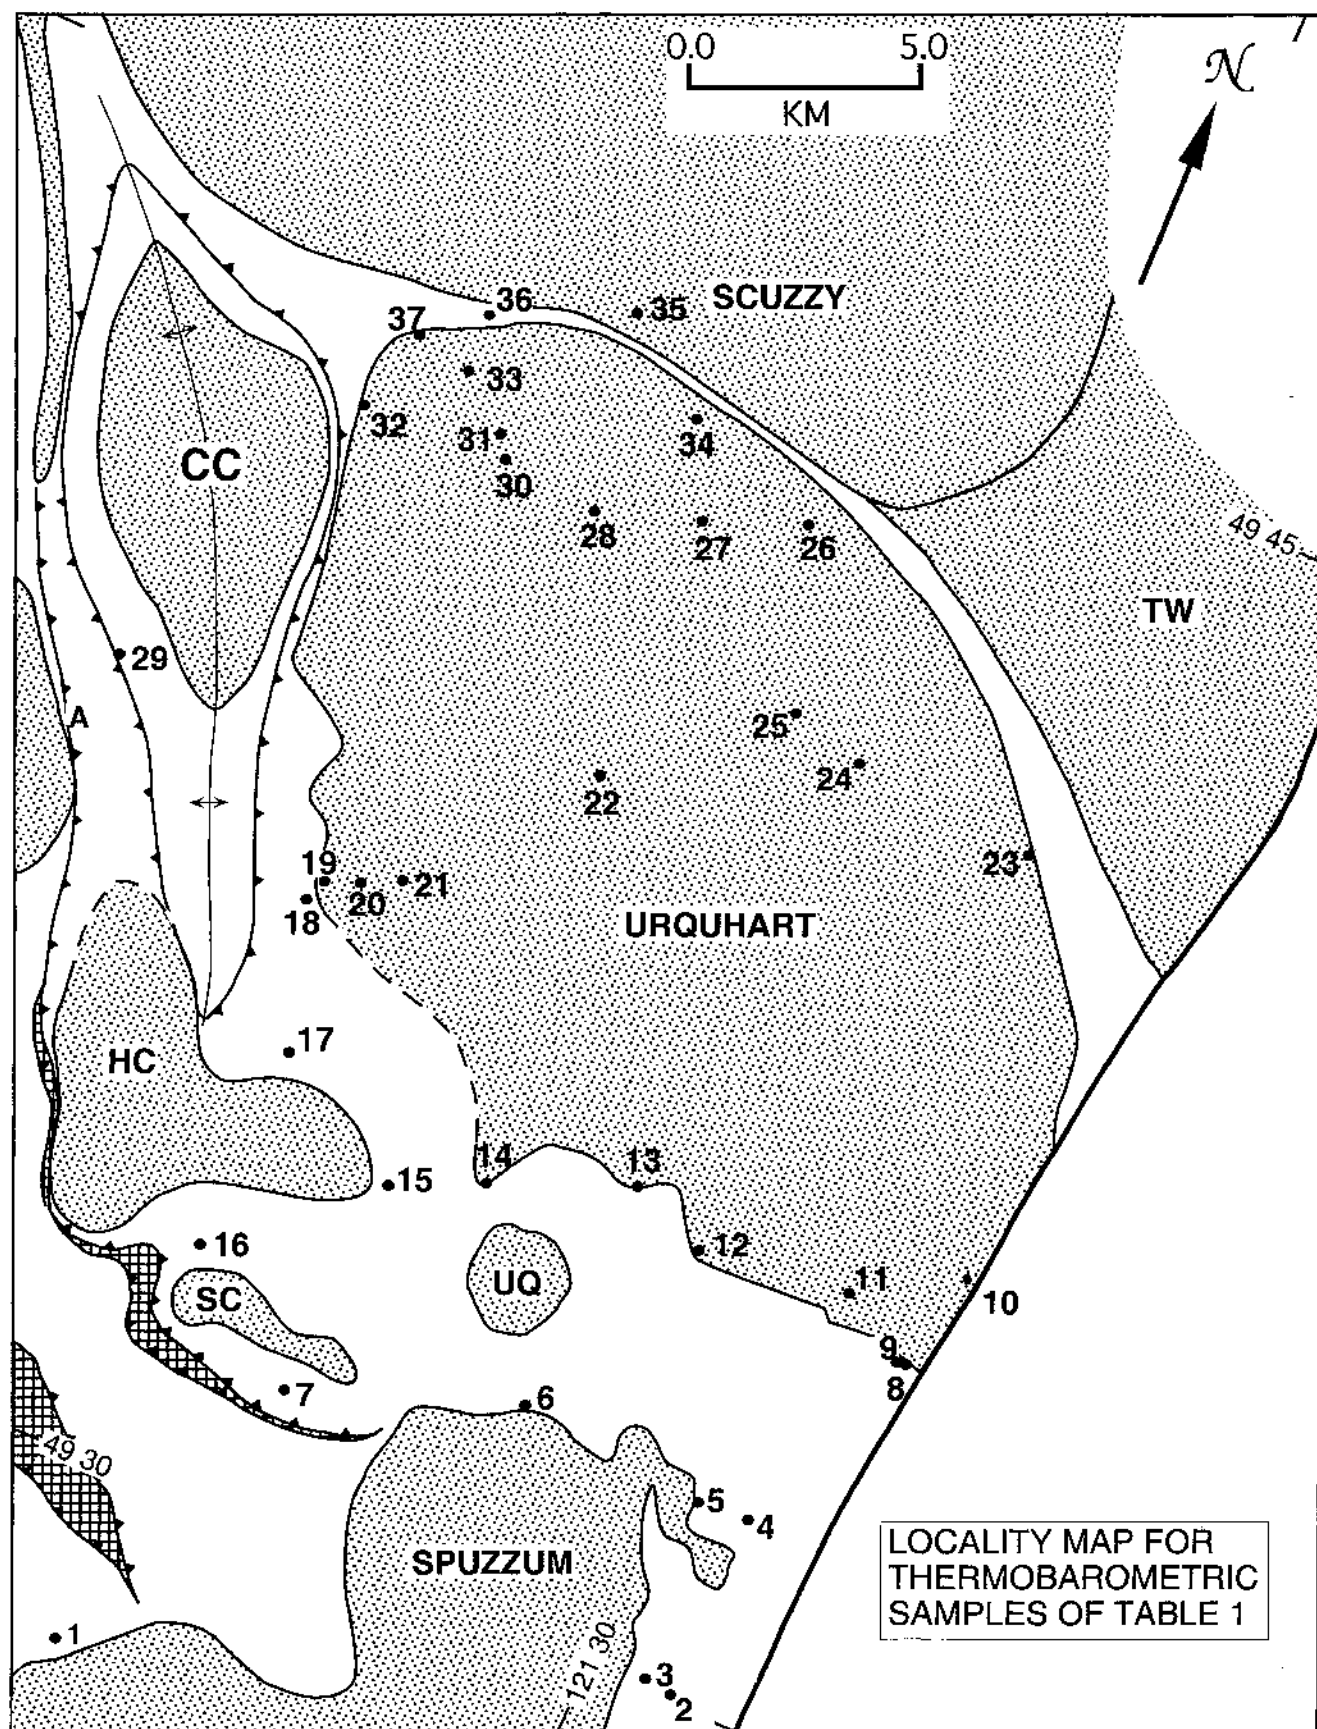

DR Fig. 1A

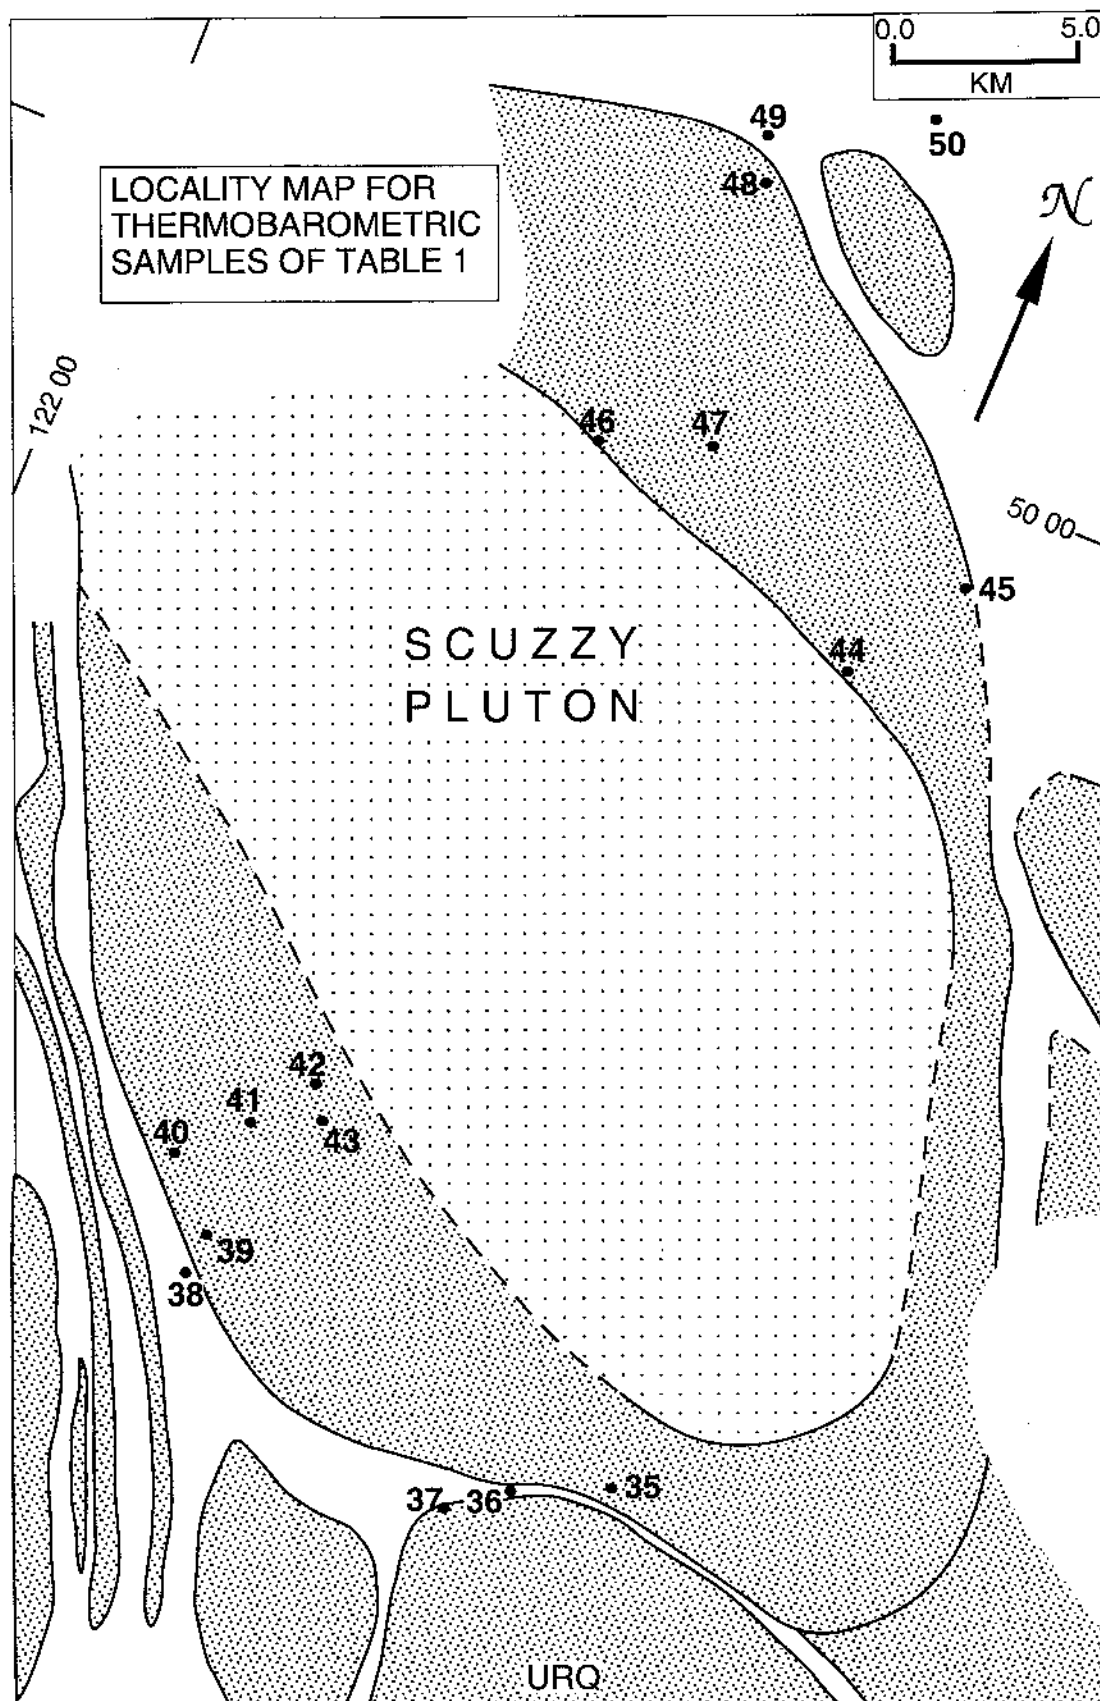

DR Fig. 1B

- + Breakenridge Cplx
- m Mount Mason
- ▣ Big Silver
- ▲ Settler Ck
- Hornet Ck
- x Clear Ck
- H Hut Ck
- Fir Ck

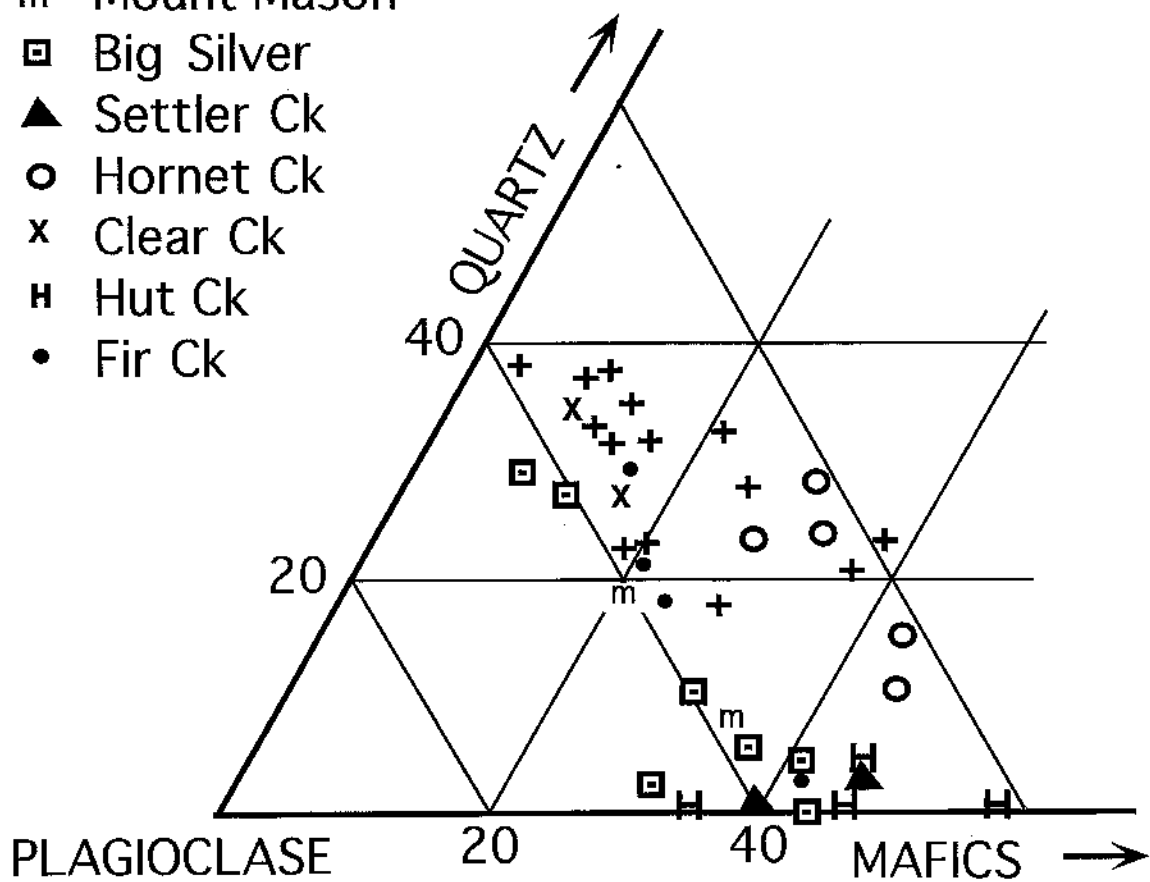

DR Fig. 2A

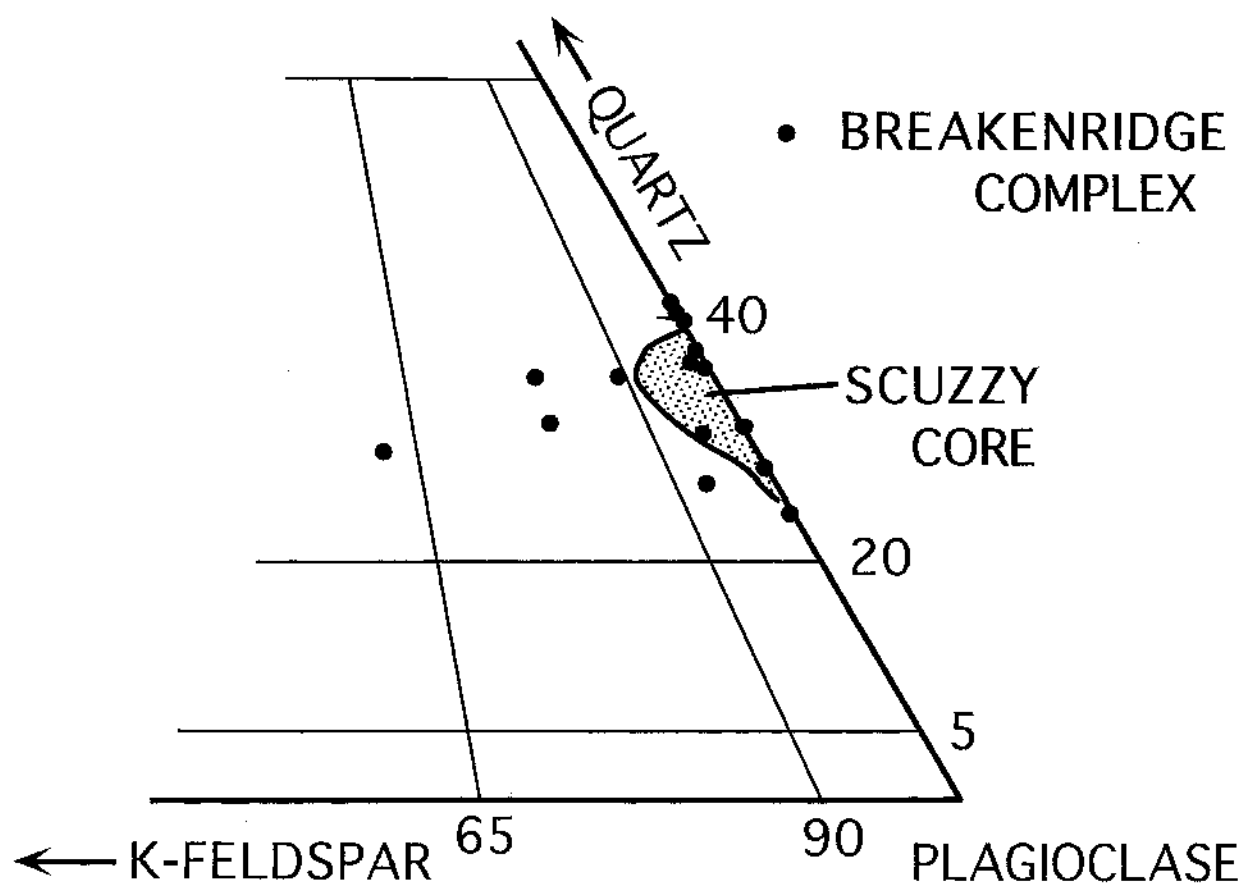

DR Fig. 2B



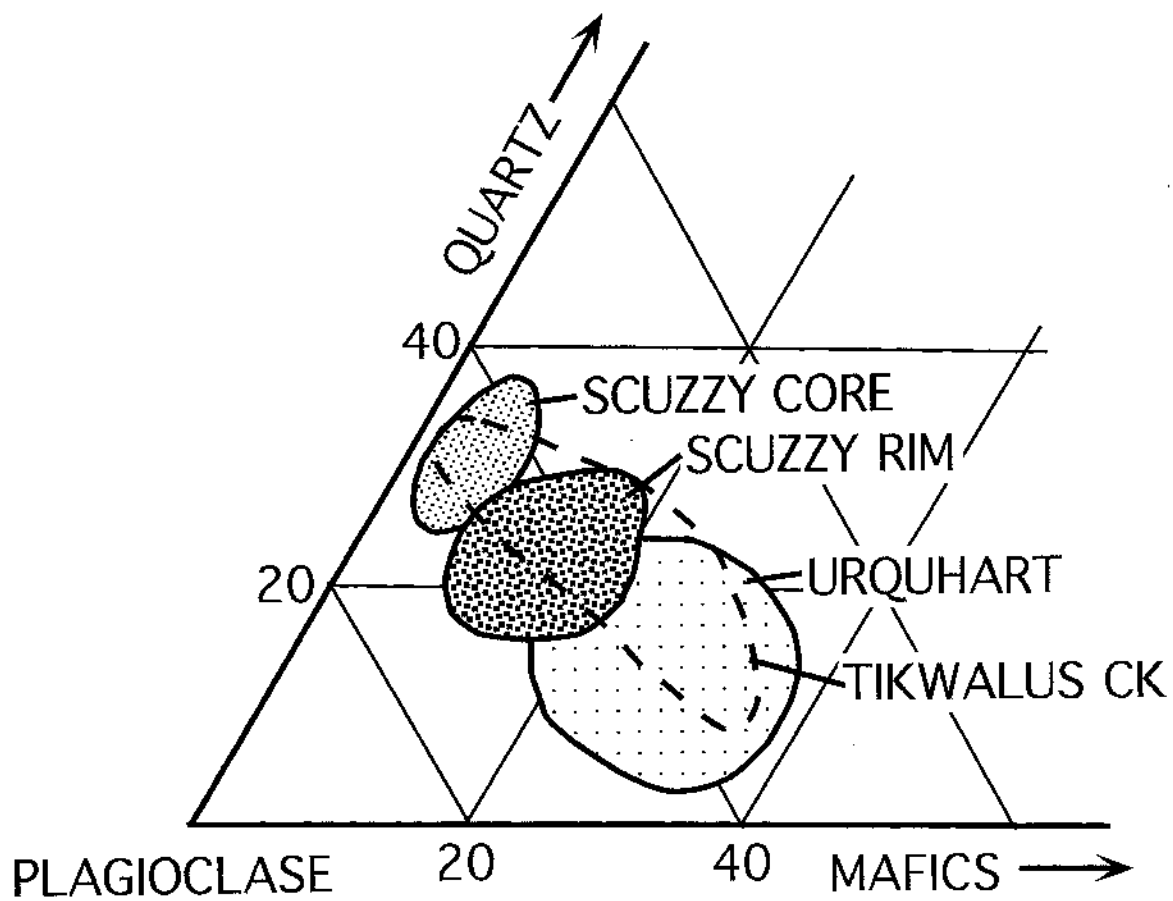

DR Fig. 2C

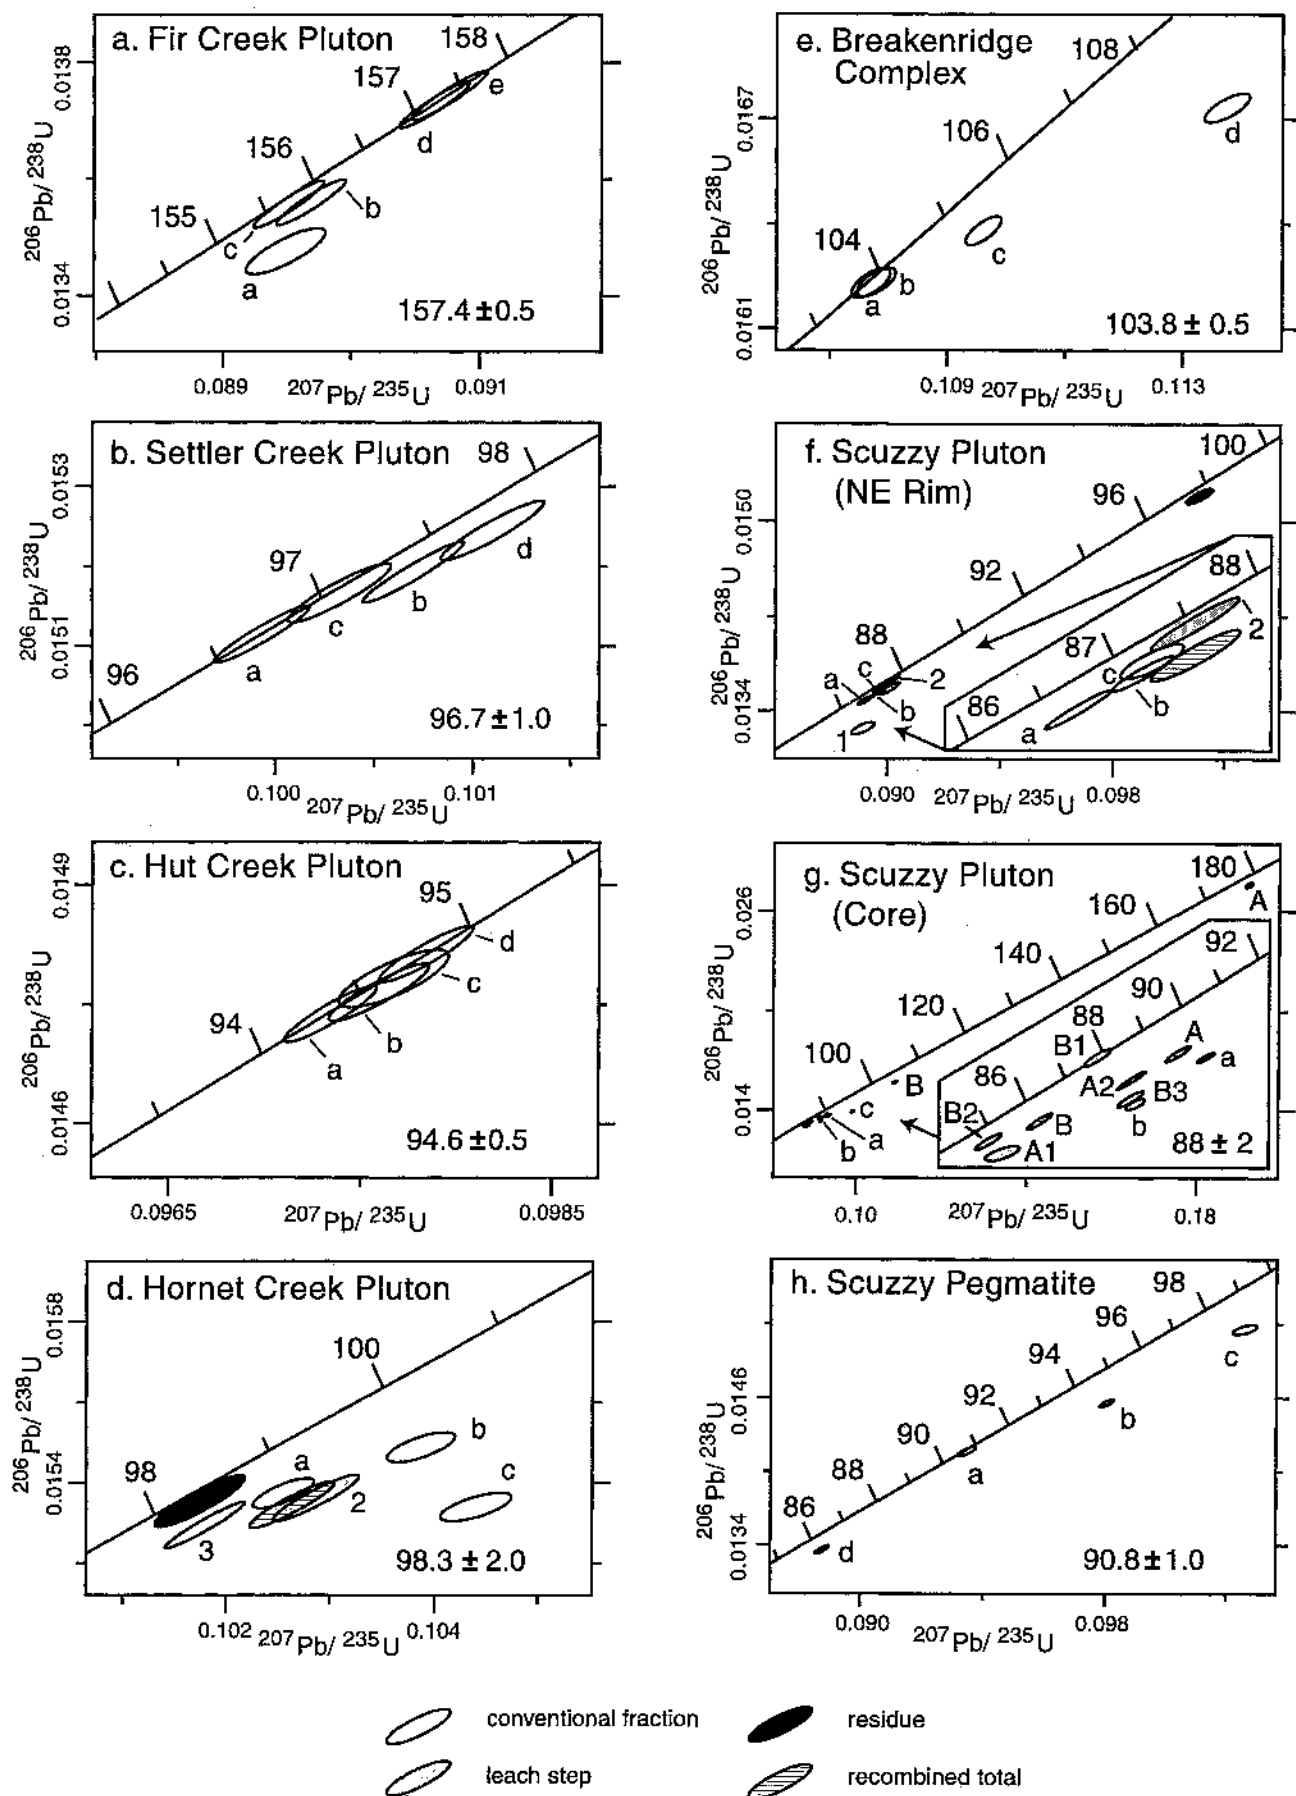

DR Fig. 3

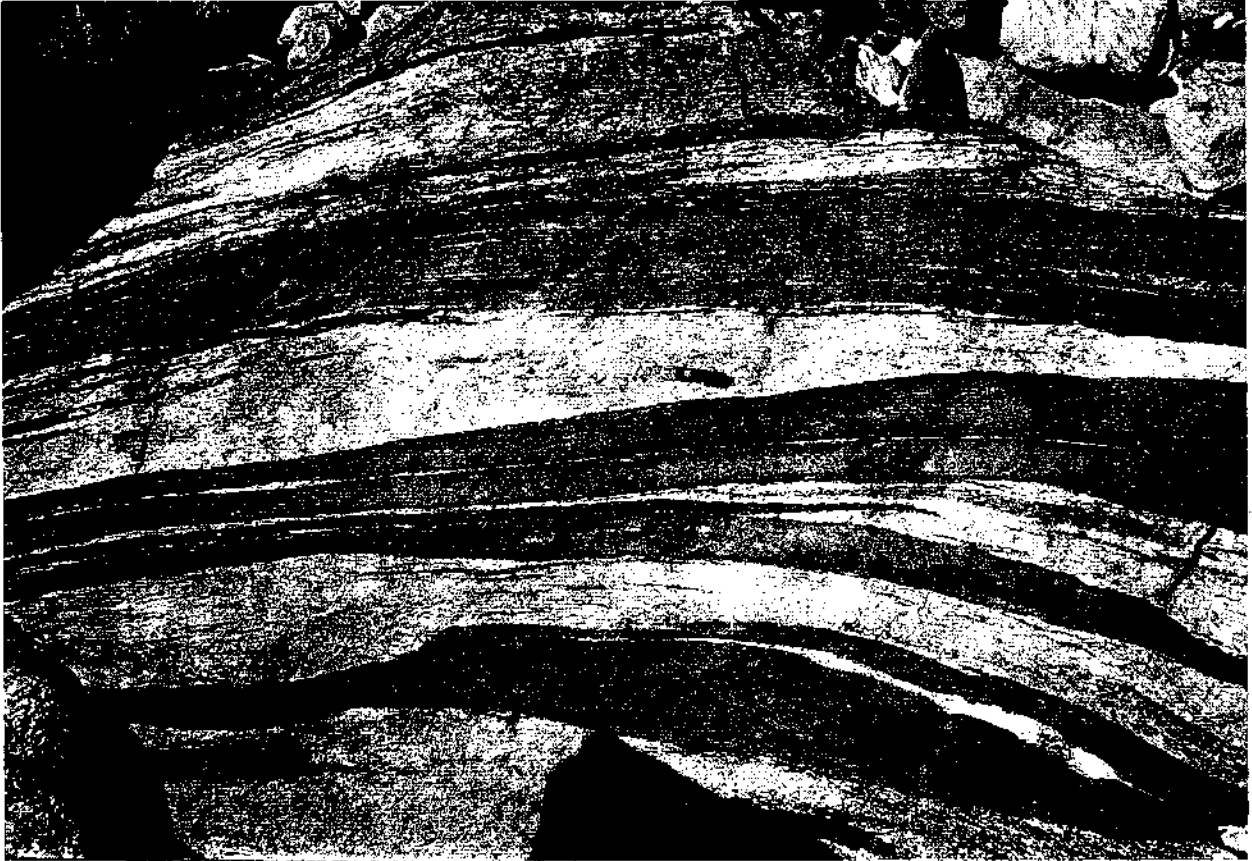

DR Fig. 4

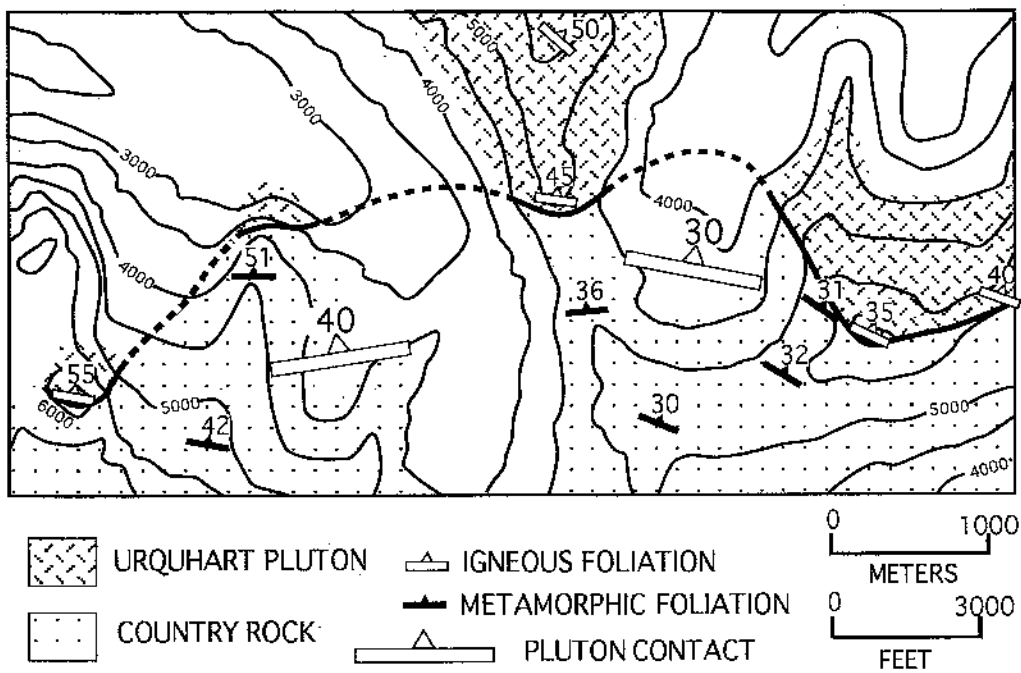

DR Fig. 5A

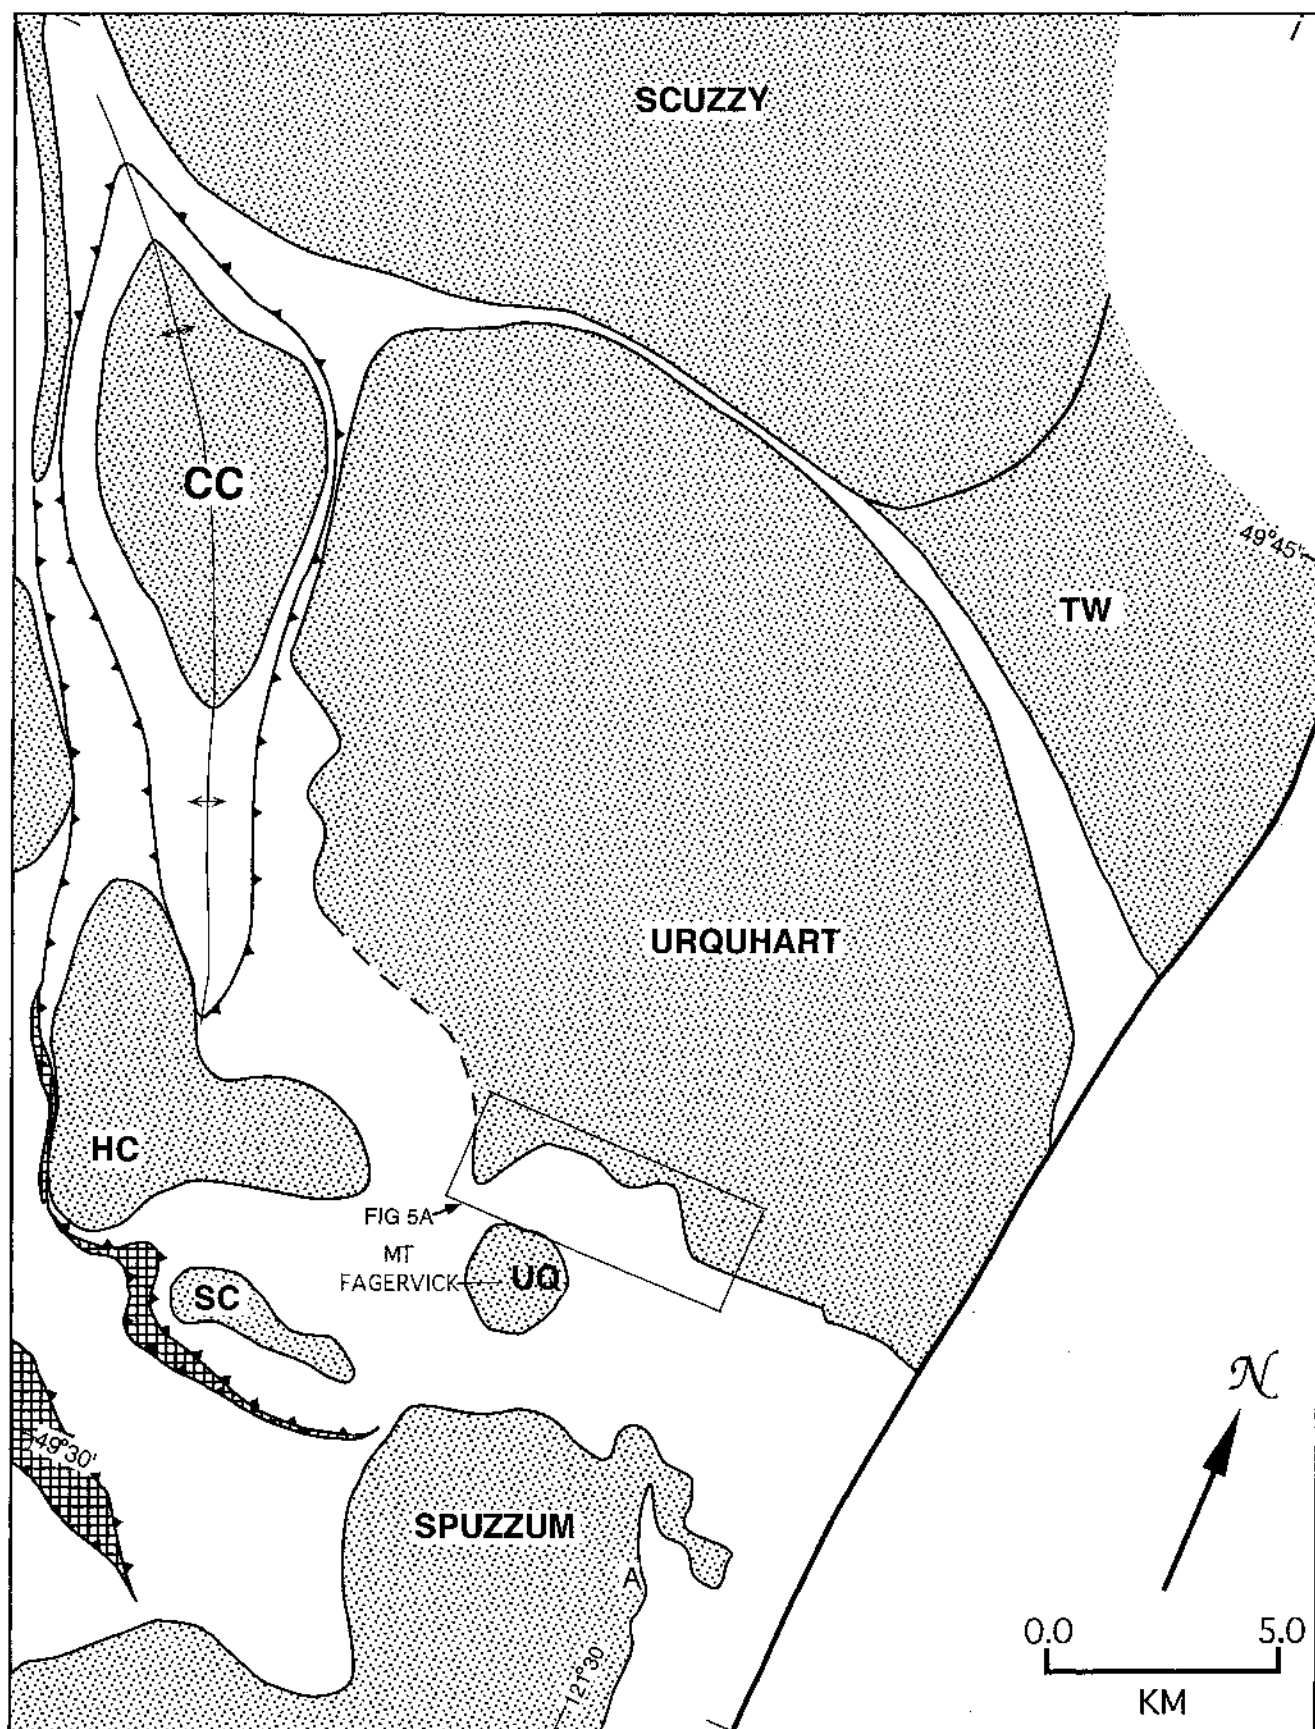

DR Fig. 5B

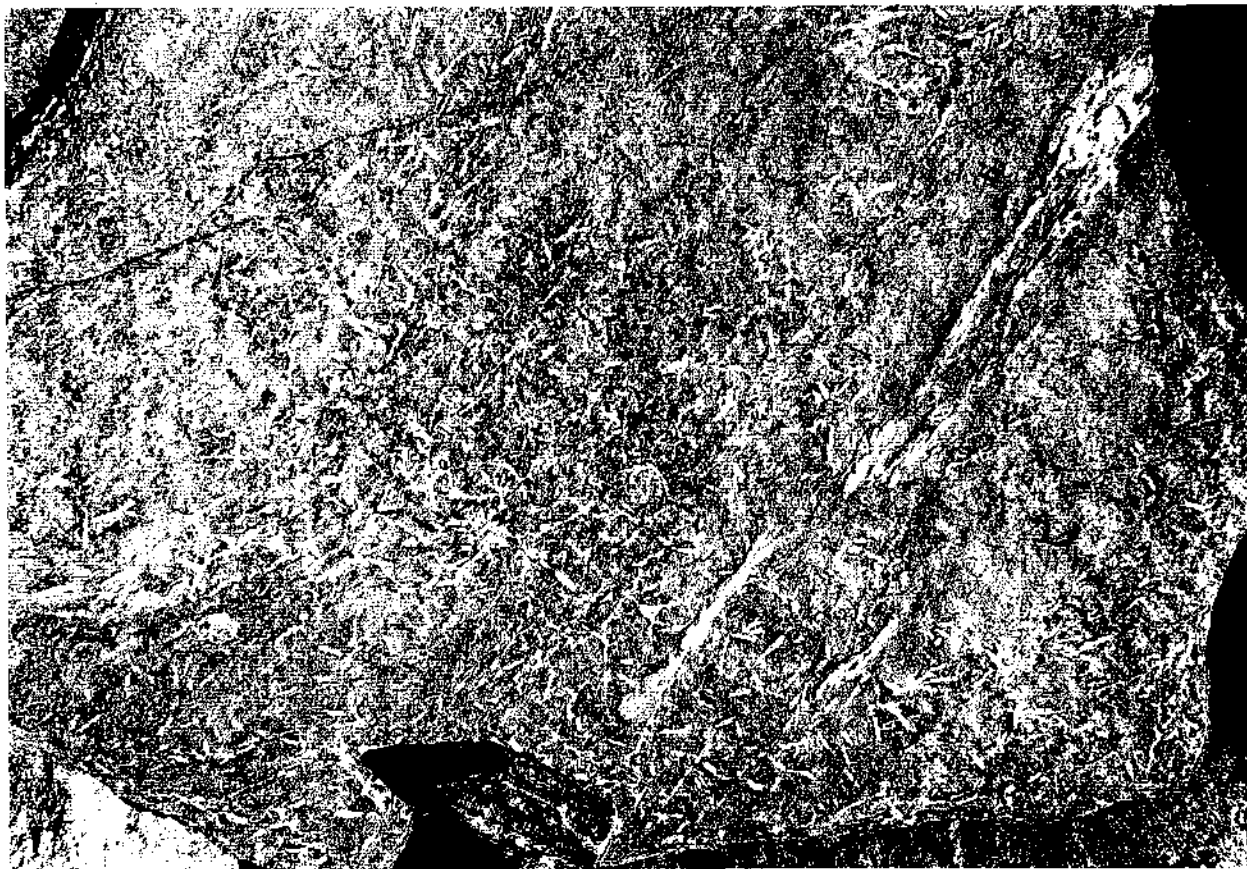

DR Fig. 6A

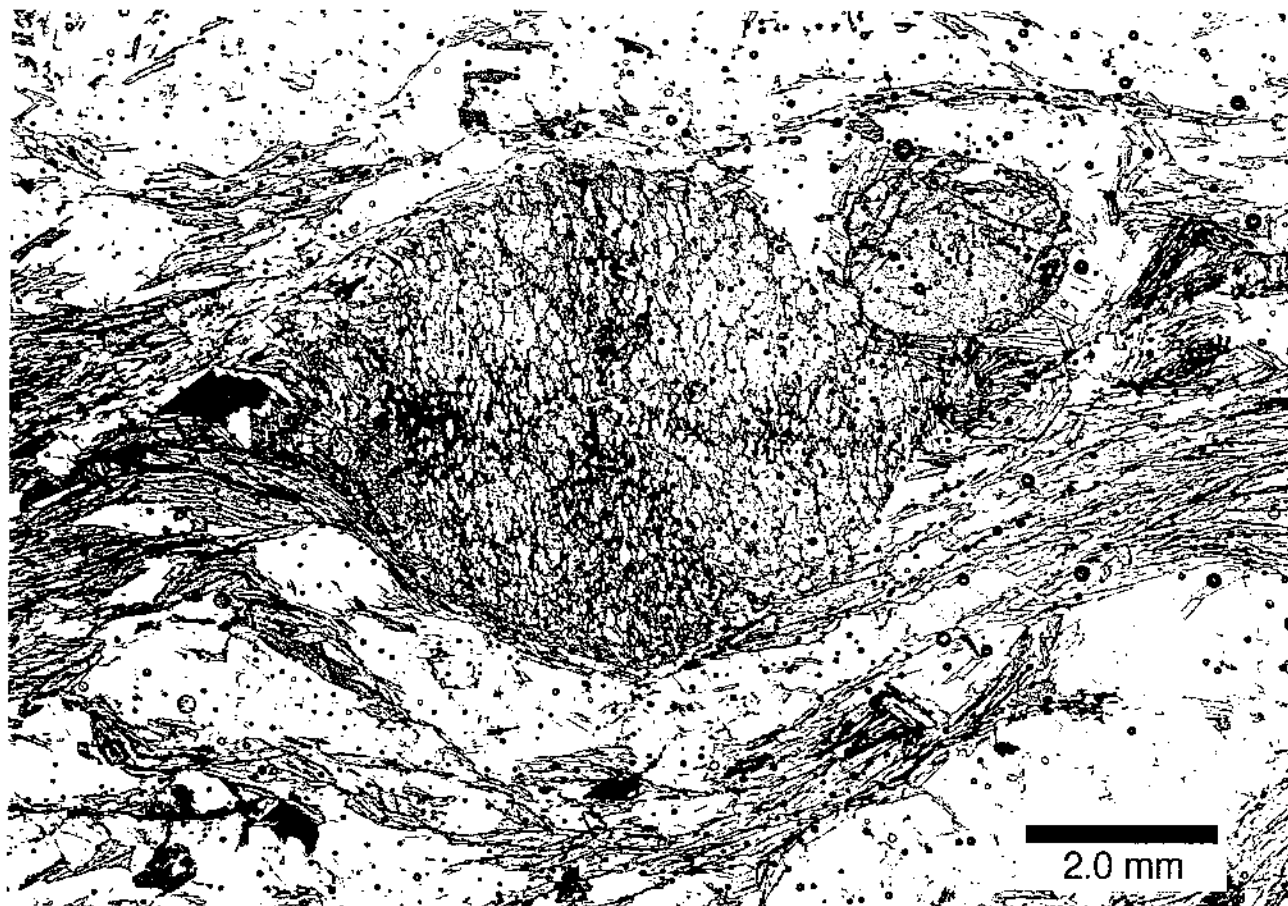

DR Fig. 6B

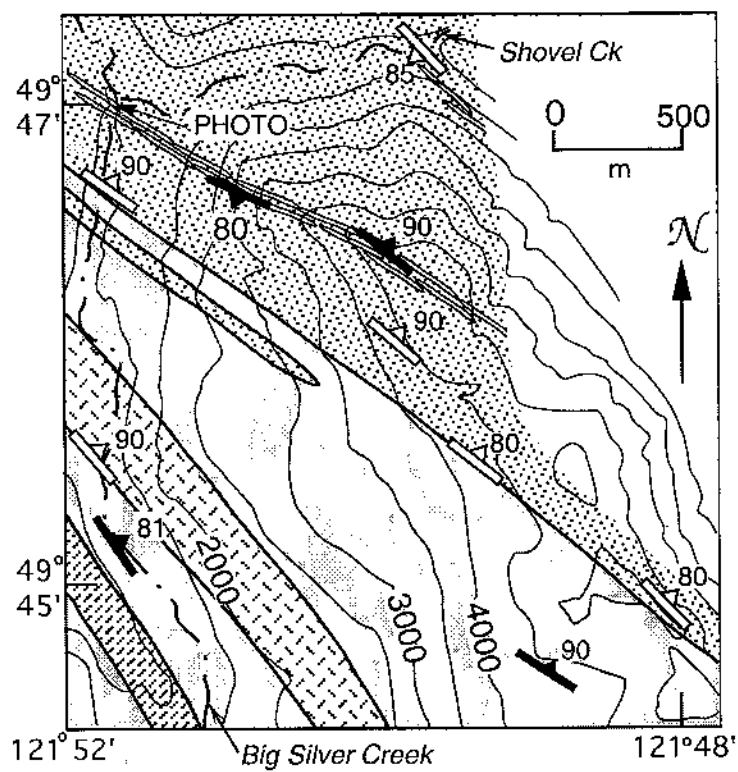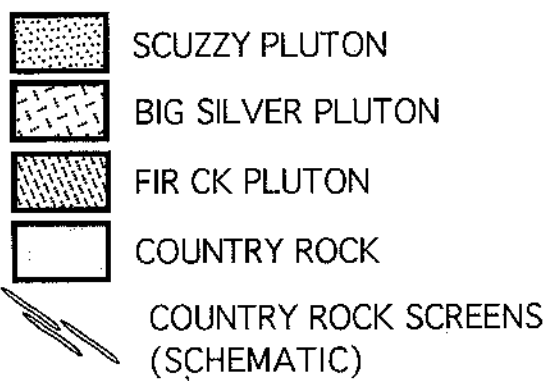

DR Fig. 7A
